# 1 Gating modules of the AMPA receptor pore domain revealed 2 by unnatural amino acid mutagenesis

3 Mette H. Poulsen<sup>#\*2</sup>, Anahita Poshtiban<sup>#1,2</sup>, Viktoria Klippenstein<sup>2</sup>, Valentina Ghisi<sup>2</sup>, Andrew  
4 Plested<sup>§1,2</sup>

5 <sup>1</sup>Institute of Biology, Cellular Biophysics, Humboldt Universität zu Berlin, 10115 Berlin,  
6 Germany <sup>2</sup>Leibniz Forschungsinstitut für Molekulare Pharmakologie (FMP), 13125 Berlin;  
7 NeuroCure, Charité Universitätsmedizin, 10117 Berlin, Germany.

8 <sup>§</sup>To whom correspondence should be addressed: [plested@fmp-berlin.de](mailto:plested@fmp-berlin.de)

9 <sup>#</sup>These authors contributed jointly

10 <sup>\*</sup>Present address: University of Copenhagen, Denmark

11 **Ionic glutamate receptors (iGluRs) are responsible for fast synaptic transmission**  
12 **throughout the nervous system. Conformational changes of the transmembrane domain**  
13 **(TMD) underlying ion channel activation and desensitization remain poorly understood.**  
14 **Here, we explored the dynamics of the TMD of AMPA-type iGluRs using genetically-**  
15 **encoded unnatural amino acid (UAA) photo-crosslinkers, p-benzoyl-L-phenylalanine**  
16 **(BzF) and p-azido-L-phenylalanine (AzF). We introduced UAAs at sites throughout the**  
17 **TMD of the GluA2 receptor and characterized these mutants in patch-clamp recordings,**  
18 **exposing them to glutamate and UV light. This approach revealed a range of optical**  
19 **effects on the activity of mutant receptors. We found evidence that an interaction**  
20 **between the Pre-M1 and the M4 TMD helix was essential for normal activation and**  
21 **desensitization. Photoactivation at F579AzF, a residue behind the selectivity filter, had**  
22 **extraordinarily broad effects on gating and desensitization. This observation suggests**  
23 **coupling to other parts of the receptor and like in other tetrameric channels, selectivity**  
24 **filter gating.**

## 25 Introduction

26 The AMPA-type glutamate receptor (AMPA), in common with other ionotropic glutamate  
27 receptors (iGluRs), includes glutamate binding domains that connect to a transmembrane ion  
28 channel pore. Glutamate binding activates the receptor and opens the channel. Despite the  
29 apparent simplicity of this activation principle, the geometries of the receptor involved in  
30 different activation states is unclear. Recently two structures from CryoEM of the active AMPAR  
31 in complex with the auxiliary subunit stargazin were published (Twomey et al., 2017a) (Chen  
32 et al., 2017). However, it remains unclear whether these structures represent fully open  
33 channels, or perhaps conformations corresponding to subconductance openings. We currently  
34 lack an active state structure for any other subtype of iGluR.

35 Numerous studies have investigated the structure and function of extracellular domains of  
36 AMPARs using pharmacological compounds and/or mutational studies (Sun et al., 2002)  
37 (Horning and Mayer, 2004). These studies suggested that desensitization and gating of  
38 AMPARs are principally regulated by the conformation of the ligand binding domain (LBD)  
39 (Carbone and Plested, 2012), while displacements of the amino terminal domains (ATD) have  
40 little effect on AMPAR function (Yelshanskaya et al., 2016a). In contrast to the extracellular  
41 domains, comparatively few studies have examined the dynamics of iGluR pore domains. One  
42 reason for this deficit is the lack of approaches for capturing movements within the  
43 transmembrane domain (TMD).

44 In tetrameric ion channels, two complementary mechanisms of channel gating have been  
45 described. The helical bundle crossing occludes the extracellular end of the AMPAR pore in  
46 closed channel structures solved to date (M3 in iGluRs, S6 in potassium channels), which is  
47 also tightly occluded in Shaker potassium channels (del Camino and Yellen, 2001) and sodium

48 channels (Oelstrom et al., 2014). But other tetrameric channels including CNG, BK and MthK  
49 exhibit either a partially or fully open bundle crossing, with the selectivity filter acting as a  
50 principal gate (Contreras et al., 2008) (Zhou et al., 2011) (Posson et al., 2013) (Thompson  
51 and Begenisich, 2012). Even in tetrameric ion channels with minimal architectures such as  
52 KcsA, selectivity filter gating underlying C-type inactivation can be coupled to voltage and  
53 opening of the bundle crossing, including gating hysteresis (Blunck et al., 2006; Labro et al.,  
54 2018; Tilegenova et al., 2017) although see: (Devaraneni et al., 2013). Cysteine accessibility  
55 experiments in AMPARs are consistent with a gate at the bundle crossing between resting and  
56 open states (Sobolevsky et al., 2004) but only two sites in the M3 helix of AMPARs could be  
57 studied with membrane impermeant reagents. Moreover, coupling between the selectivity filter  
58 and bundle crossing has not been investigated and may occur in other functional states.

59 Real-time analysis of receptor activity coupled to chemical crosslinking has the potential to  
60 identify sites that have a state-dependent disruption of channel gating. Several techniques to  
61 produce crosslinks between parts of the receptor have been used, including disulfide bonding,  
62 and the introduction of artificial metal binding sites to bridge subunits (Ahmed et al., 2011)  
63 (Lau et al., 2013; Baranovic et al., 2016; Sobolevsky et al., 2004) (Armstrong et al., 2006).  
64 However, these approaches require solvent access to the sites of interest, which is not feasible  
65 for many sites within the membrane embedded channel domain.

66 To study the TMD at arbitrary sites, we exploited unnatural amino acids (UAAs). We chose  
67 UAAs that are reactive after irradiation with UV light, and that consequently form covalent  
68 bonds to nearby protein segments. We used a well-characterised genetic encoding method that  
69 has been shown to be highly selective and potent in experiments on 7-TM metabotropic  
70 receptors and rhodopsin (Ye et al., 2010; Ye et al., 2009; Ye et al., 2008; Naganathan et al.,  
71 2013), potassium channels (Martin et al., 2016) (Murray et al., 2016) and NMDA- and AMPA-  
72 subtypes of iGluRs (Klippenstein et al., 2014; Klippenstein et al., 2017) (Tian and Ye, 2016).  
73 We inserted individual TAG (amber) stop codons throughout the TMD of the AMPAR subtype  
74 GluA2, rescued these introduced stop codons with p-benzoyl-L-phenylalanine (BzF) and p-  
75 azido-L-phenylalanine (AzF) and measured the effects of UV exposures on currents induced by  
76 glutamate. We also assessed physical crosslinking with protein biochemistry. These  
77 experiments, in concert with analysis of kinetic mechanisms, revealed an unforeseen extent of  
78 control of gating and desensitization by both core and peripheral elements of the ion channel  
79 domain.

## 80 **Results**

81 We selected 24 sites in the TMD of GluA2 to insert either of two photoactivatable UAAs, AzF  
82 or BzF (Figure 1A). The size of AzF is comparable to tyrosine and tryptophan, whereas BzF is  
83 bulkier (Figure 1B). Although we preferred to replace aromatic residues, we selected other  
84 amino acids at sites that allowed us to cover all four membrane segments, M1-M4. In figure 1  
85 (C & D) we also outline the basic results of the electrophysiological, optical activation and  
86 biochemical experiments. This survey already permits some conclusions about the utility and  
87 chemistry of UAA crosslinking in the transmembrane segments, as we outline below.

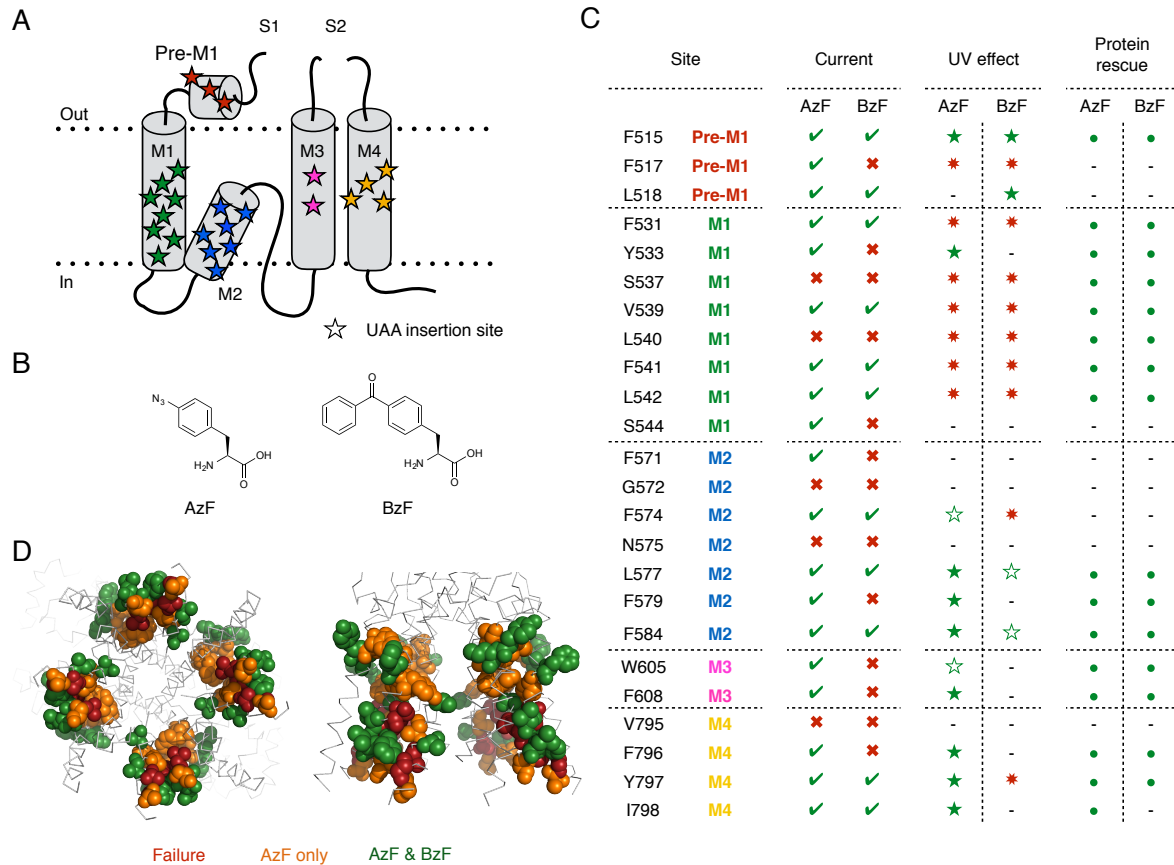

88

89 **Figure 1. Site-specific incorporation of AzF & BzF.**

90 **A** Cartoon of the TMD of one subunit. Stars indicate UAA insertion sites. **B** Chemical structures of AzF  
 91 and BzF. **C** Summary of electrophysiology, UV effects on currents and expression characteristics. Color-  
 92 coding of sites according to panel A. Under ‘Current’, green ticks indicate constructs for which glutamate  
 93 induced currents could be detected, and red crosses indicate constructs where no currents could be  
 94 recorded for AzF or BzF incorporation. Receptors were exposed to UV light in the resting and/or  
 95 desensitized state during electrophysiological recordings. Green filled stars indicate a specific UV-  
 96 triggered effect and red asterisks indicate no apparent effect of UV light. Unfilled green stars indicate  
 97 constructs (GluA2-F574AzF, -W605AzF, -L577BzF and -F584BzF) where large rundown in the current  
 98 amplitude precluded quantitation of any possible slow concurrent UV effects. Recordings of the GluA2-  
 99 I798BzF mutant had rapid rundown and leak currents that were larger than usual. The currents for  
 100 GluA2-F571AzF and -S544AzF mutants were too small to permit analysis of UV-driven effects (indicated  
 101 by hyphens). Western blot analysis indicated that “rescue” of translation was successful for all the  
 102 constructs tested, indicated by filled green circles. A hyphen also indicates no test.

103 **D** Representation of insertion sites shown as color-coded spheres in a GluA2 crystal structure (PDB ID:  
 104 3kg2). Red spheres indicate failure of both AzF and BzF to rescue functional receptors (‘Current’ column  
 105 in panel C), whereas orange spheres indicate successful insertion of only AzF and green spheres indicate  
 106 successful insertion of both AzF and BzF.

107 First, we found insertion sites in all helices at which we could rescue functional channels at the  
 108 plasma membrane. At 19 of the 24 sites, typical fast glutamate-activated currents could be  
 109 recorded from channels harbouring AzF. At 11 of these sites, BzF also produced functional  
 110 channels. There were no sites at which the bulkier BzF could preferentially rescue channel  
 111 function. Viewed on the basis of crystal structures of GluA2, a further aspect of functional  
 112 rescue was apparent. Sites that readily accommodated both amino acids tended to be found at  
 113 the circumference of the membrane domain, whereas sites that produced non-functional

114 channels for both AzF and BzF tended to be centrally located around the channel pore. An  
115 intermediate layer of sites was permissive for AzF alone (Figure 1D).

116 At 9 of the 19 sites rescued by AzF, we could detect a robust alteration of channel gating upon  
117 exposure to UV light. We explore in more detail the nature of these changes below. Strikingly,  
118 we could not determine a robust effect of BzF photoactivation on currents for any of the sites  
119 tested, except for the peripheral sites at F515 and L518 in the “Pre-M1” helix, which are likely  
120 to be outside the plasma membrane in any case. We did detect a weak effect of UV exposure  
121 when BzF was incorporated in the M2 helix at position 577, however, the effect was hard to  
122 separate from current rundown. The absence of distinct UV-induced changes on receptor  
123 function for constructs containing BzF is surprising in light of experiments in which membrane  
124 domains were crosslinked with Benzophenone [PMID: 11524017], but may relate to water  
125 accessibility in such sites. The only water accessible sites in the AMPAR pore domain are likely  
126 to be in the M3 helix (Sobolevsky et al., 2005) (Sobolevsky et al., 2003) (Salussolia et al.,  
127 2011) and BzF failed to produce functional channels at these sites.

128 A possible confounder of these results was that a lack of glutamate-activated current expression  
129 was because of a failure to translate the polypeptide chain. Therefore, we performed  
130 biochemical experiments to assess rescue of expression. These experiments confirmed that for  
131 both AzF and BzF, inclusion of the UAAs and the requisite synthetase and exogenous tRNA  
132 were sufficient to strongly enrich expression of the full-length subunits (Figure 1C,  
133 Supplementary Figure 1 and Supplementary Table 1, range 5- to 3500-fold increase in band  
134 intensity for 10 mutants). On average, wild-type receptors showed no change in expression  
135 level in the presence of the UAAs and the incorporation machinery. These experiments do not  
136 provide information about the maturity of the tetrameric form of the receptor, or about surface  
137 expression, but do indicate that deficits due to UAAs were either in assembly and/or gating,  
138 not in a gross absence of translation of the full-length polypeptide chain.

139 To assess whether functional receptors rescued by AzF and BzF were valid congeners of wild-  
140 type receptors, we assessed their desensitization, deactivation and recovery from  
141 desensitization. Example traces are plotted in Figure 2 and analysis of the kinetics of nine  
142 mutants is provided in Supplementary Table 2. Out of all the mutants tested, only insertion of  
143 AzF at position 798 had any appreciable effect on kinetics slowing the rate of entry to  
144 desensitization to  $50 \pm 5 \text{ s}^{-1}$  ( $n = 6$  patches) compared to  $120 \pm 10 \text{ s}^{-1}$  for wild-type receptors  
145 ( $n = 36$  patches). Overall, the range of deactivation rates was from  $1200 \text{ s}^{-1}$  to  $2200 \text{ s}^{-1}$ ,  
146 compared to the average wild-type value of  $1600 \pm 120 \text{ s}^{-1}$  ( $n = 27$ ) and the recovery from  
147 desensitization ranged from  $45 \text{ s}^{-1}$  to  $70 \text{ s}^{-1}$  compared to the average wild-type value of  $55 \pm 5$   
148  $\text{ s}^{-1}$  ( $n = 17$ ) (Figure 2; Supplementary Table 2). Therefore, we took the mutants in their basal  
149 state, before any UV exposure, to have gating largely representative of GluA2 wild-type (WT)  
150 channels.

### 151 **Patterns of UV-induced inhibition**

152 Previously, we generated photo-inactivatable AMPARs by inserting BzF in the extracellular  
153 domains of GluA2 (Klippenstein et al., 2014). Due to their incorporation sites, these mutations  
154 were expected to trap an inactive state if they formed crosslinks. Here, we chose sites on a  
155 pseudo-random basis, without any particular expected photo-crosslinking effect. For five of the  
156 AzF mutants, the effect of UV illumination was a rapid, irreversible loss of the peak current  
157 response (Figure 3A-D; Supplementary Table 3). Independent of the location (in any of the  
158 four membrane segments, M1-4), we could inhibit the peak current by up to 95%. The fastest  
159 inhibitory action was observed for the F608AzF mutant, with a time constant of 1.5 s for  
160 cumulative exposures to UV (in intervals of 200 ms per episode) for reduction of the peak  
161 current to  $4 \pm 1\%$  of its original value (barely distinguishable from background noise;  $n = 17$ ,

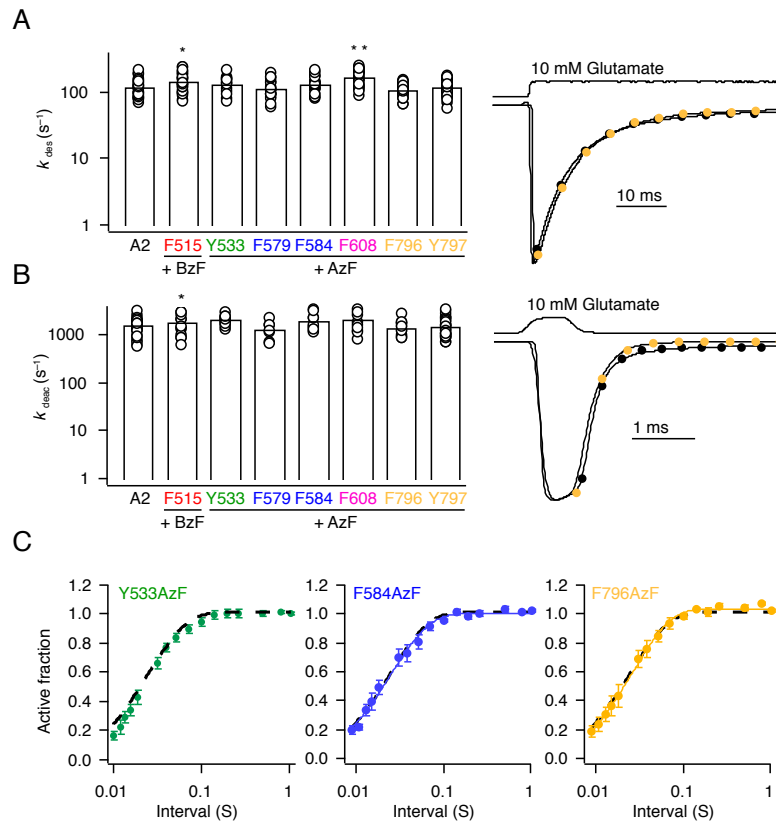

162

163 **Figure 2. Kinetics of GluA2 receptors harboring AzF or BzF in the transmembrane domain.**

164 **A** Bar graph (*left*) summarizing desensitization rates of selected GluA2 constructs with AzF or BzF.  
 165 \*\*Significant difference GluA2 WT vs. mutant ( $p < 0.001$ , t-test), \* Significant difference GluA2 WT vs.  
 166 mutant ( $p < 0.05$ , t-test). Traces (*right*) illustrating the rate of desensitization of GluA2 WT (*black*) and  
 167 F796AzF (*yellow*). **B** Bar graph (*left*) summarizing deactivation rates for selected constructs with AzF or  
 168 BzF after a brief (1 ms) pulse of 10 mM glutamate. Traces (*right*) illustrate the rate of deactivation of  
 169 GluA2 WT (*black*) and F796AzF (*yellow*). **C** Pooled data for recovery from desensitization of GluA2 WT  
 170 (black dotted line), GluA2-Y533AzF (green), -F584AzF (blue) and -F796AzF (yellow). See  
 171 Supplementary Table 2 for a summary of rates.

172 Figure 3C and Supplementary Table 3). We were able to control the speed of inactivation by  
 173 changing the intensity of the UV light (50% to 100%) or the time interval of UV exposure per  
 174 episode (50 ms and 200 ms) (Supplementary Figure 2). We exposed receptors to UV light in  
 175 resting and desensitized states by opening the shutter at the appropriate stages of each episode.  
 176 To examine the active state, we initially blocked desensitization with cyclothiazide (CTZ), but  
 177 found that CTZ itself could induce a UV-sensitive inhibition (Supplementary Figure 3) that  
 178 varied from batch to batch. To avoid this problem, we instead performed experiments on the  
 179 background of the L483Y mutation for all constructs, with the exception of F608AzF-L483Y,  
 180 which did not express. For this particular construct, F608AzF, the UV induced inhibition in  
 181 presence of CTZ was much faster than the CTZ-driven UV dependent inhibition of GluA2 WT  
 182 (see Supplementary Table 3). Surprisingly, the effects of UV exposure were independent of the  
 183 functional state of the receptor. Values for all the constructs tested that showed UV dependent  
 184 inhibition are reported in Supplementary Table 3. As previously reported (Klippenstein et al.,  
 185 2014), we controlled for non-specific rundown of currents by pausing the UV exposures in the  
 186 course of some experiments, observing that the peak current remained stable, and then  
 187 reverting to UV-driven inhibition.

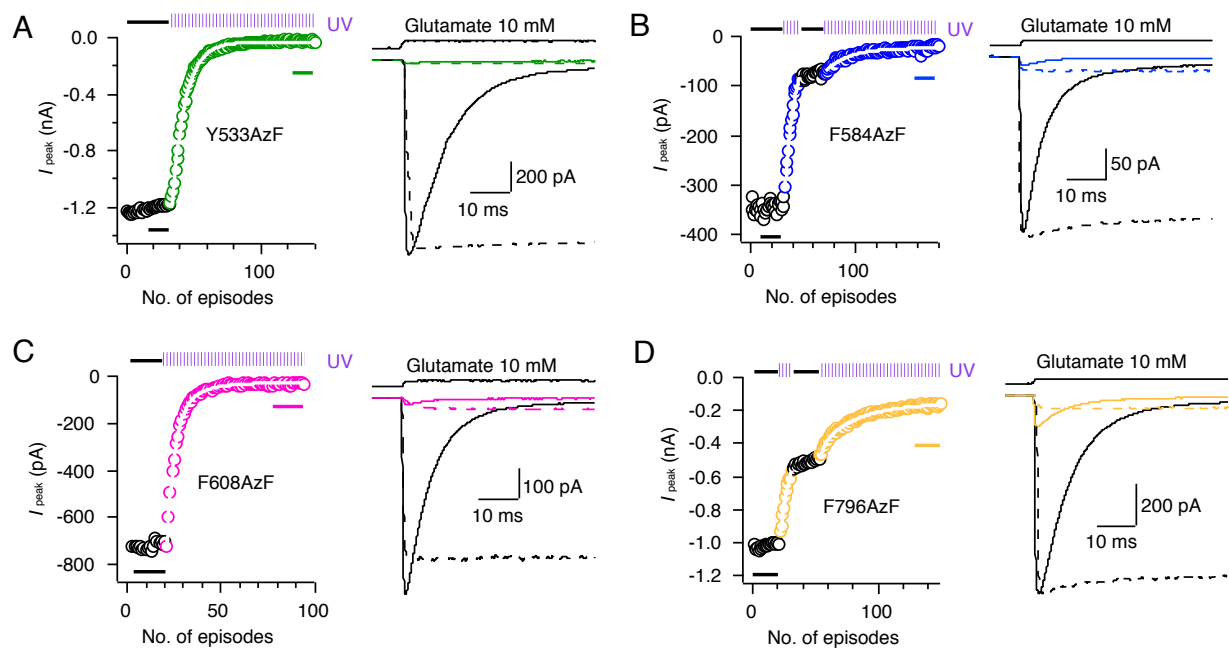

188

189

**Figure 3. UV-triggered inhibition of glutamate-induced currents.**

190 **A-D Left;** Examples of kymograms illustrating the time course of receptor photo-inactivation for the  
 191 selected GluA2 constructs. Each episode included a 400 ms application of 10 mM glutamate (each  
 192 circle represents the peak current of the response). A 200 ms exposure of UV epi-illumination was  
 193 made in each episode (indicated in the kymogram by violet pulse trains and colored circles). The rate  
 194 of peak current reduction was monoexponential (white outlined fits). There was no significant  
 195 difference between monoexponential half-times in different states of activation. **Right;** Traces  
 196 representing averages of 5–20 responses to glutamate before UV exposure (black trace) and after UV  
 197 exposure (colored) in either the resting or desensitized state (solid lines, taken from points indicated  
 198 by bars in kymogram) and fully active state (corresponding L483Y mutant, dotted line). It was not  
 199 possible to record any glutamate induced current from GluA2-L483Y-F608AzF, therefore CTZ was used  
 200 to block desensitization for this construct.

201 Such a consistent pattern of inhibitory action might argue for a non-specific loss of channel  
 202 function, but several observations counter this proposition. As shown previously (Klippenstein  
 203 et al., 2014), GluA2 WT receptors were insensitive to UV light (Supplementary Figure 4A), as  
 204 were some mutants. For example, F531AzF was reliably rescued by AzF but showed no UV  
 205 sensitivity at all (Supplementary Figure 4B), speaking against non-specific photo-destructive  
 206 effects based on AzF. A further control was provided by the F584TAG mutant in the absence of  
 207 any UAA. All permissive AzF mutants had some degree of readthrough (that is, background  
 208 rescue in the absence of UAA). The F584TAG mutation had the largest readthrough currents  
 209 on average, similar in magnitude to those in the presence of AzF (Supplementary Table 4).  
 210 However, unlike responses from receptors containing the AzF residue, the responses obtained  
 211 (in the absence of AzF) were entirely insensitive to UV illumination. A typical recording from  
 212 the F584TAG mutant from a cell cultured in the absence of AzF is shown in supplementary  
 213 figure 4C.

214 Although these controls gave us confidence that the inhibitory effects were site-specific, the  
 215 behaviour of several other mutants provided more compelling evidence. For example, the  
 216 F796AzF mutation in M4 was inhibited by UV, but inhibition was incomplete reaching only  
 217 about 85%. In addition, we found that incorporating AzF in M2 at position F579 also resulted  
 218 in inhibition upon UV illumination, but only to 75% and with a concomitant increase in steady-  
 219 state current (see below and Supplementary Table 3). This suggests that the effects of AzF  
 220 activation within the transmembrane domain are site-specific.

## 221 Photopotential

222 As would be expected from an unbiased screen of the gating region, in addition to inhibition,  
 223 we also found four mutants that had a strong potentiating effect on function. For F515BzF  
 224 the peak current was on average increased 1.6-fold, with a larger 2.5-fold increase in the relative  
 225 steady-state current compared to the peak current size (Figure 4 and Supplementary Table 3).  
 226 Peak current was also increased for the non-desensitizing LY mutant indicating an effect on  
 227 gating, not a simple block of desensitization (Sun et al., 2002). Glutamate-activated peak and  
 228 steady-state currents were similarly increased for L518BzF by 1.3-fold and 7.8-fold,  
 229 respectively (Figure 4). As expected from a stabilisation of the open state, paired measurements  
 230 in the same patch (before and after UV exposure) showed the rate of entry to desensitization

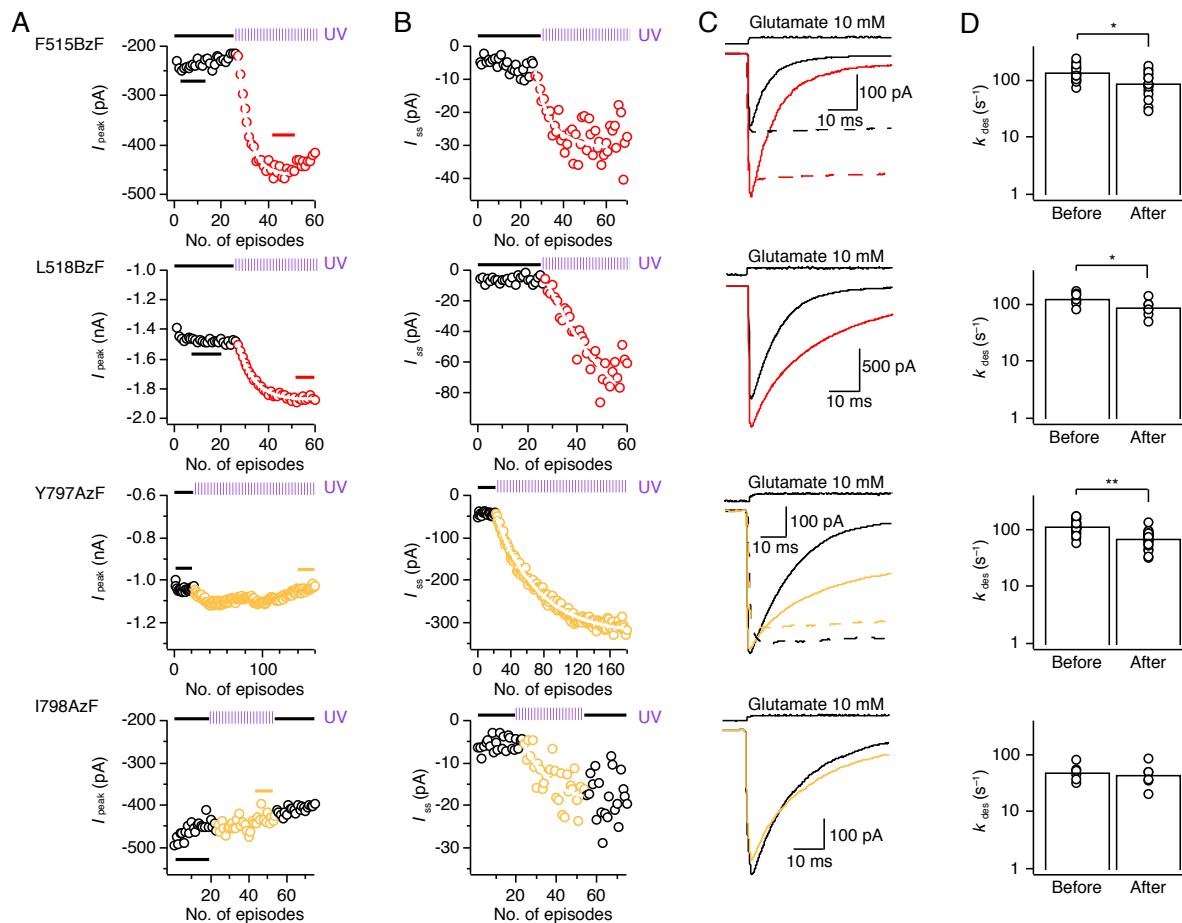

## 231 Figure 4. UV-triggered potentiation of AMPAR responses.

232 A-B Example kymographs illustrating the time course of the potentiation of peak (A) and steady state (B)  
 233 current for GluA2-F515BzF (top row), GluA2-L518BzF (second row) GluA2-Y797AzF (third row) and  
 234 GluA2-I798AzF (bottom row). The rate of peak current potentiation was monoexponential (white  
 235 outlined fits). C Example current traces representing averages of 5–20 responses to glutamate before UV  
 236 exposure (black trace) and after UV exposure (colored) in either the resting or desensitized state (solid  
 237 lines, taken from points indicated by bars in kymogram). Representative currents from the corresponding  
 238 L483Y mutants (active state UV exposure, dotted lines) are shown for F515BzF and Y797AzF. D Bar  
 239 graphs summarize desensitization rates in 10 mM glutamate of GluA2-F515BzF, -L518BzF, -Y797AzF  
 240 and -I798AzF before and after UV exposures (see Supplementary Table 2 for a summary of rates).

241 was slowed (from  $140 \pm 10 \text{ s}^{-1}$  to  $90 \pm 10 \text{ s}^{-1}$ ,  $n = 19$  and  $130 \pm 10 \text{ s}^{-1}$  to  $90 \pm 10 \text{ s}^{-1}$ ,  $n = 7$ ,  
242 for F515BzF and L518BzF, respectively). An analysis including both paired and non-paired data  
243 is in Supplementary Table 2.

244 A similar effect on receptor activation behaviour was seen for AzF introduced in M4 at position  
245 Y797, with an increase in the steady-state current (3.7-fold), presumably corresponding to the  
246 block of desensitization (from  $120 \pm 5 \text{ s}^{-1}$  to  $70 \pm 5 \text{ s}^{-1}$ ,  $n = 24$ ) (Figure 4). Similarly, the  
247 relative steady-state current increased, albeit more variably, following UV exposure when AzF  
248 was incorporated into the neighbouring M4 position at I798 (fold increase of  $7 \pm 3$ , Figure 4  
249 and Supplementary Table 3). The extent of photopotential of the steady-state currents did  
250 not correlate with the initial size of the relative steady-state currents before the application of  
251 UV light ( $R^2$  range from 0.06 to 0.2, Supplementary Figure 5). Notably, desensitization was  
252 slowed by incorporating AzF at position I798 and did not change with exposure to UV light  
253 (from  $50 \pm 5 \text{ s}^{-1}$  to  $45 \pm 10 \text{ s}^{-1}$ ,  $n = 6$ ) (Figure 4). Since the I798AzF construct showed  
254 pronounced rundown, we were unable to determine deactivation and recovery from  
255 desensitization kinetics before and after applying UV light.

256

### 257 **The interaction between the Pre-M1 and M4 helices.**

258 The confluence of the functional results in terms of potentiation of constructs with BzF in Pre-  
259 M1 (F515BzF, L518BzF) and AzF in M4 (Y797AzF, I798AzF) led us to ask what structural  
260 dynamics could produce these effects. Inserting the mutated residues into the closed state  
261 structure of GluA2 provides a striking hypothesis: reciprocal crosslinking between these two  
262 sites is physically plausible (Figure 5A). The BzF substitution at position 515 is located on the  
263 outer face of the Pre-M1 helix, but a rotation or outward bloom of this “collar” (Twomey et al.,  
264 2017a) could allow the photoactivated BzF radical to contact the M4 helix. Likewise, the AzF  
265 at 797 is likely buried within the membrane but conformational change could allow it to reach  
266 multiple crosslinking partners. Rotations of M4 could permit crosslinking onto M3 or M1 of the  
267 neighbouring subunit, but approach of the Pre-M1 helix from the same subunit, as envisaged  
268 above, could also bring this residue into potential contact.

269 Intersubunit crosslinks, like those previously seen for the S729BzF mutant (Klippenstein et al.,  
270 2014) were negligible for GluA2 WT receptors and all mutants that we tested (Supplementary  
271 Table 1). To test our hypothesis of reciprocal crosslinking between Pre-M1 and M4 within  
272 subunits, we used a principle based on a previously published study (Xu et al., 2013), as  
273 illustrated in Figure 5B. Using antibodies to label both N- and C- termini, we used quantitative  
274 Western blotting to determine the protection against protease digestion afforded by  
275 crosslinking. We expected to detect intrasubunit crosslinking if the UV-activated UAA was able  
276 to physically connect fragments divided by an inline tobacco-etch virus (TEV) cleavage site.  
277 Following brief UV exposures of 2 and 5 minutes, the F515BzF mutant harbouring a TEV  
278 cleavage site showed a small but reproducible increase in the protected monomer fraction  
279 (Figure 5C-D). Based on the location of F515 in structures of GluA2, and our failure to detect  
280 any increase in dimers or higher order oligomers, this result indicates cross-linking to M4 of  
281 the same subunit. The Y797AzF and I798AzF mutants did not show detectable monomer  
282 protection (Figure 5C-D), indicating that the effects in electrophysiological experiments likely  
283 arise either from a ring-expansion of the phenyl ring, or crosslinking to lipid. Both  
284 interpretations require a movement of M4 (see discussion). These exposures to UV light were  
285 about 100-fold less intense than those experienced by receptors during patch clamp  
286 experiments and epi-illumination by UV (Klippenstein et al., 2014), therefore the total  
287 exposure over a few minutes should be similar to those in electrophysiology experiments.  
288 Longer exposures of 15-30 minutes, which we previously used to test for dimer (and higher  
289 order) fractions, were not relevant for the rapid changes in the gating properties that we were  
290 concerned with.



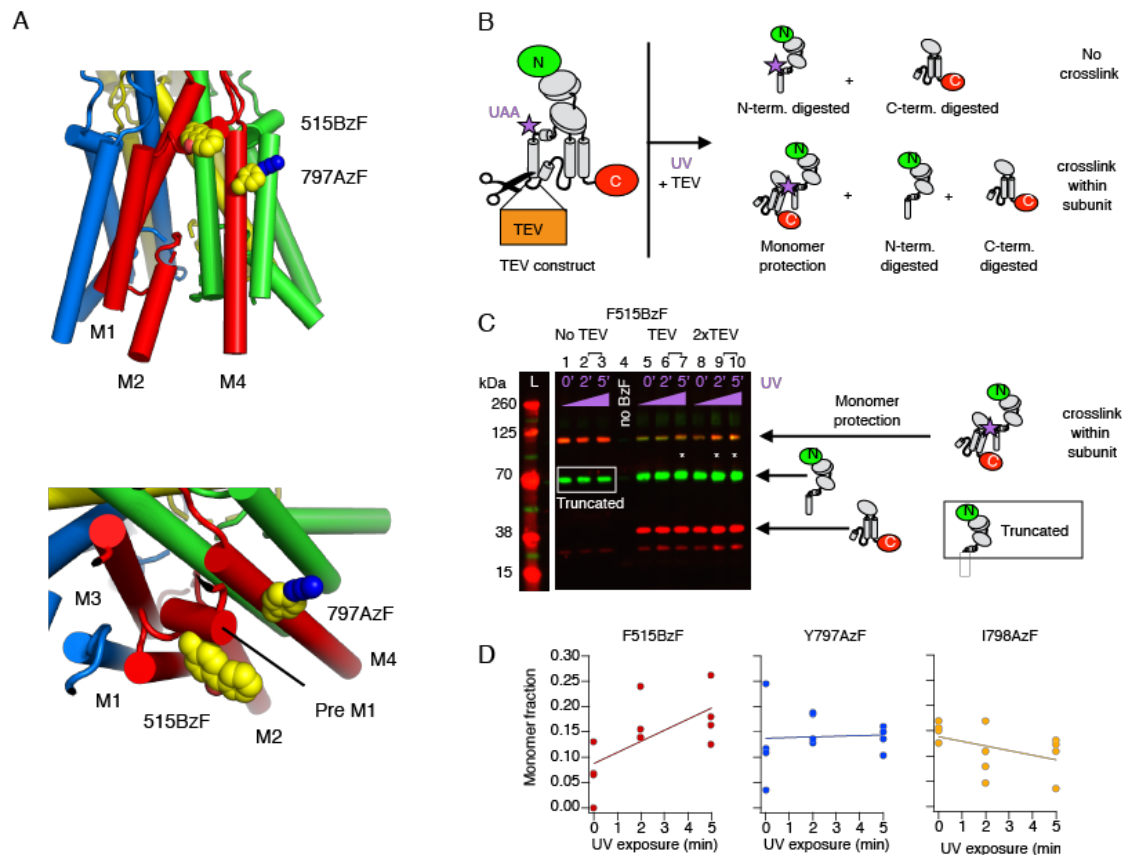

291 **Figure 5. Intra-subunit crosslinking by BzF.**

292 A Structure of the TMD with AzF and BzF incorporated at sites 797 and 515, respectively, illustrating  
 293 the close proximity of the two sites. B Cartoon of the TEV construct and fragments generated by TEV  
 294 protease treatment. A site for TEV protease recognition was introduced in the M1-M2 intracellular loop  
 295 of the GluA2 subunit as well as a C-terminal FLAG-tag epitope and a TAG mutation for incorporation of  
 296 UAA (*violet star*). Covalent bridging within a subunit of the two fragments arising from TEV protease  
 297 treatment should “protect” a monomeric subunit band on western blots. C Exemplary western blot  
 298 showing monomer protection of GluA2-F515BzF. For all conditions the band at 63 kDa corresponds to  
 299 GluA2 truncated at residue 515. The truncated band is undistinguishable from the digested N-terminus  
 300 when TEV protease is added (64 kDa). Lane 1-3: Quantitation of the rescue of F515TAG construct in  
 301 cells by BzF, showed a monomeric band at 100 kDa. A band from subunits truncated at the TAG site (63  
 302 kDa) is present, presumably pulled down in FLAG purification with full-length subunits. Lane 4: The  
 303 omission of only the UAA results in no rescue of monomeric band. A band corresponding to subunits  
 304 truncated at the TAG site can be visualized on the blot, however the band is very faint, presumably due  
 305 to a lack of any FLAG epitope. Lane 5-7: Quantitation of GluA2-F515BzF treated with TEV protease  
 306 showed an increase of monomer fraction with longer exposure to UV. Lane 8-10: Exposing GluA2-  
 307 F515BzF to twice the amount of TEV protease (relative to lane 5-6) led to an increase in protection of  
 308 monomers, indicating more crosslinking events. D Summary of the monomeric fraction plotted against  
 309 the UV exposure time. Only insertion of BzF in position 515 showed an increase in monomer protection  
 310 over time.

311 **Structural mapping of photoactive sites**

312 The effects of UV exposure on the peak, relative and absolute steady-state current of rescued  
 313 receptors are summarised as bar plots in figure 6. We mapped these effects onto a structure of  
 314 the GluA2 TMD (PDB: 3KG2; Figure 6B). These plots suggested gradients in the peak and  
 315 steady-state current effects, but any correlations are weak ( $R^2 = 0.3$  for the fold change in peak  
 316 current against radial distance; Supplementary Figure 6). The weakness of these relations is

317 not surprising, given that the chemistry of individual side chain environments as well as local  
318 motions must influence the effect of a given residue on channel gating motions.

319  
320 Structures of GluA2 in resting, active and desensitized states are now available, so we next  
321 asked if the displacement of residues between structures could be related to the photo-activated  
322 effects on currents. We selected two nominally resting structures bound with antagonists (5L1B  
323 and 5VHZ), two active state structures with open pores (5VOT and 5WEO) and two  
324 desensitized state structures (5VOV and 5WEK). These structures were obtained in both the  
325 presence and absence of different auxiliary proteins, which may contribute to variations  
326 between them. We aligned them on the basis of their membrane embedded segments and  
327 measured per-subunit distances between residues in structures, and also took radial  
328 displacements by halving distances between diametrically-opposed subunits (e.g. A and C, and  
329 B and D; Supplementary Figure 7).

330 Measurements of distances between residues in different states produced a complex picture  
331 indicating considerable structural plasticity both within and between functional states. The two  
332 open state structures are quite similar, but the variability between the closed state structures  
333 was high (Supplementary Figure 7C) and accounts for almost all the variability found in C-  
334 alpha positions between “closed” and “open”. Notably, the most variable regions are the  
335 selectivity filter and the top of the M4 helix.

336 Finding no clear relation between geometry and the functional effect, we produced a 2-D map  
337 of gating changes after UV exposure (Figure 7A), plotting the peak current change against the  
338 relative steady-state current change. The plot delineates a cluster of null mutants, and two  
339 clear groups for which functional changes emerged, whereas the F579AzF mutant was a  
340 striking outlier. In the first of the two groups, peak current was inhibited and the steady-state  
341 current concomitantly increased (Figure 7A, purple circles). In the second group, a robust  
342 increase in steady-state current was accompanied with either increase or no change in the peak  
343 current (Figure 7A, green circles). Notably, F579AzF could be described as an outlier in plots  
344 of peak current and steady-state current against geometry (Supplementary Figure 6).

345 Simulations based on a simple single binding site model of AMPARs (Carbone and Plested,  
346 2012; Carbone and Plested, 2016) can mimic the behaviour of these two groups (Figure 7B-  
347 D). The behaviour of the first group of mutants on the 2-D plot was reproduced by progressively  
348 reducing the lifetime of the desensitized state AD2 or by allowing the desensitized state to  
349 become weakly conductive (Figure 7B-D). The kinetic behaviour of the second group of  
350 mutants was reproduced by altering the channel shutting rate  $\alpha$  or the opening rate  $\beta$  (Figure  
351 7B-D). The quantitative agreement between the 5-fold increase in the steady-state current  
352 accompanied by a 50-fold reduction in the peak current predicted by this model, and the effects  
353 on actual mutants (e.g. 608AzF) is notable. Most importantly, these simulations indicated that  
354 crosslinking at the F579 position is complex in nature, and must involve multiple effects on  
355 kinetic model parameters, where both the lifetime of desensitization and channel opening rate  
356 change (Figure 7B-D). A further manipulation, allowing the desensitised state to become  
357 progressively weakly conductive gave the best description (Figure 7B-D).

358 Figure 7E (and Movie 1) illustrates four classes of residues that we could segregate by analogy  
359 to kinetic models of AMPAR activation. The residues form contiguous clusters in the TMD,  
360 suggesting that they correspond to functional modules that execute distinct gating functions.

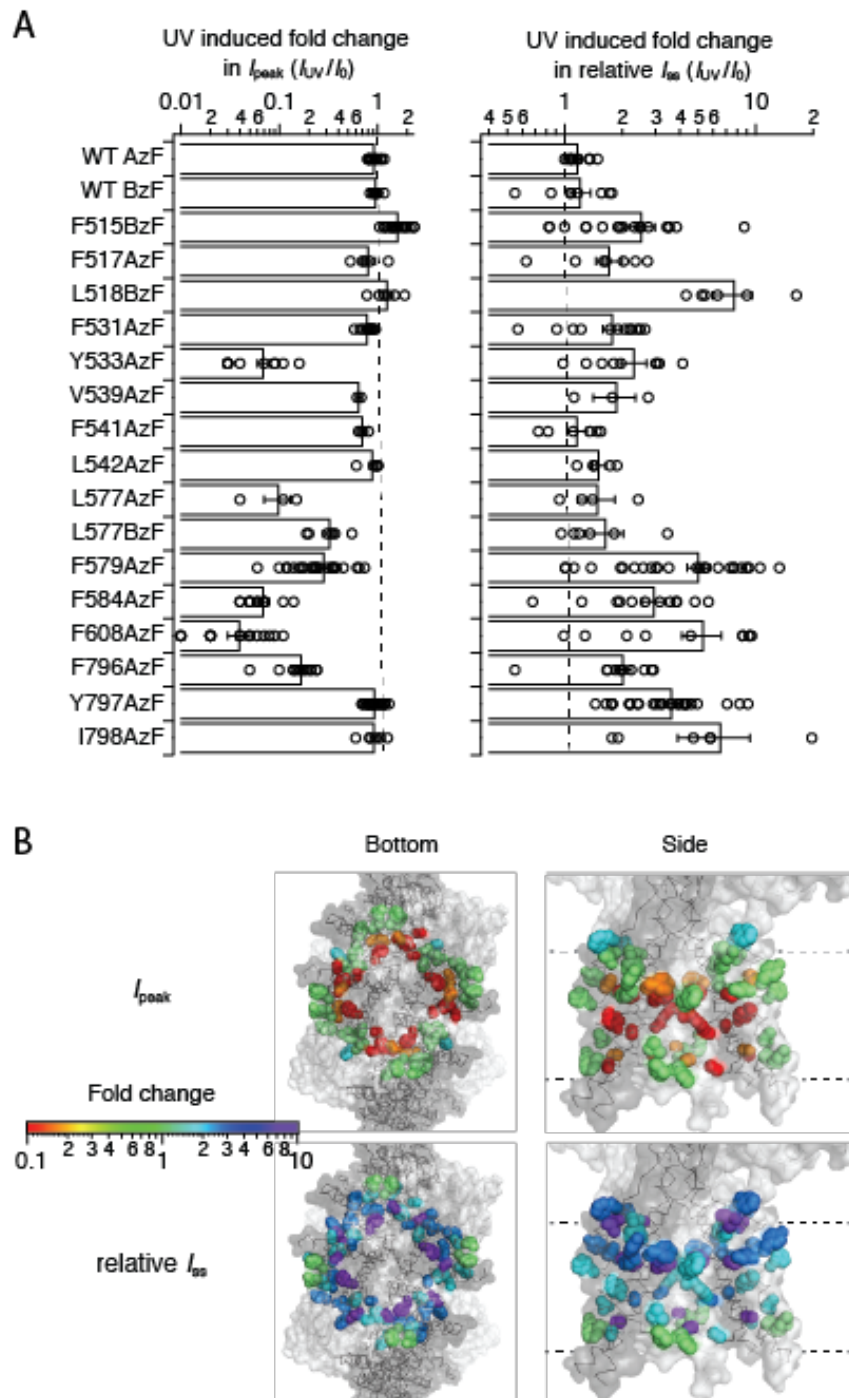

361 **Figure 6. Segregation of sites by UV effect.**

362 A Bar graph (*left*) representing the summary of the change in peak current before ( $I_0$ ) and after UV ( $I_{UV}$ )  
 363 of selected GluA2 constructs with AzF or BzF incorporated in the TMD. Small reductions in peak current  
 364 (like for GluA2-F517AzF) are likely due to rundown and not related to the application of UV. Bar graph  
 365 (*right*) summarizing the fold change in steady-state current relative to the peak current. B Bottom and  
 366 side view of structures showing AzF and BzF insertion sites as spheres colored according to their UV-  
 367 dependent changes in peak current amplitude (*upper*) and relative steady-state current (*lower*). Each  
 368 site is highlighted in color in all four subunits. The color scale (*left*) is representing the colors used to  
 369 show the fold change measured for each construct.

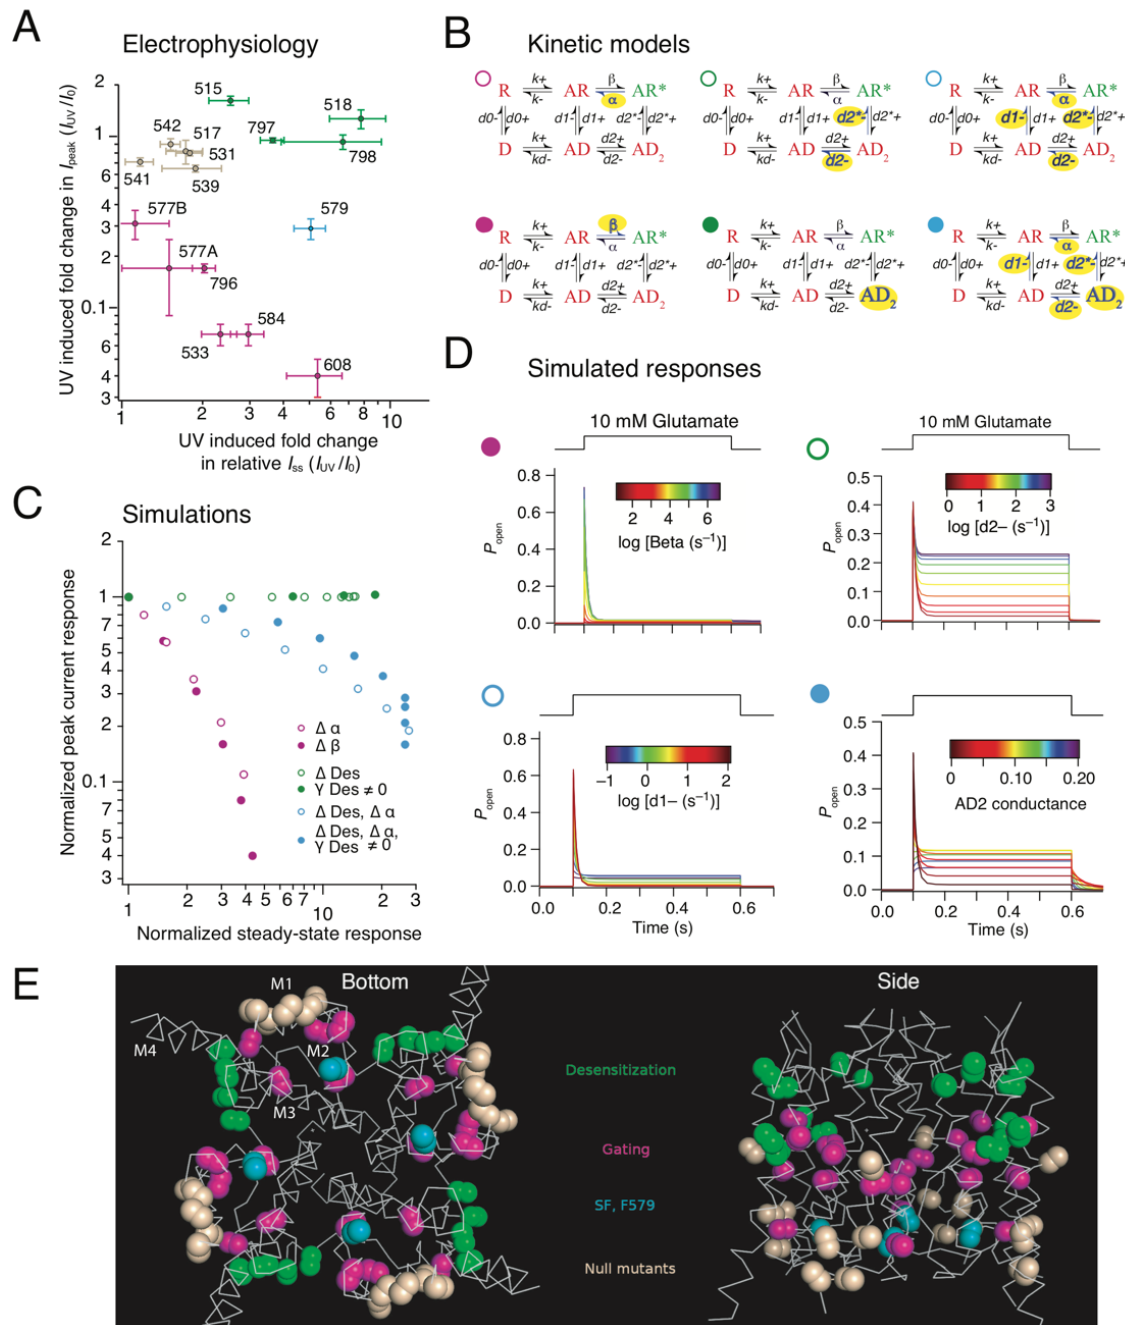

370 **Figure 7. Identifying gating modules** A 2-D plot shows the relation between the mean UV-induced  
371 changes in peak and relative steady-state current before ( $I_0$ ) and after UV ( $I_{UV}$ ) at each site. Sites are  
372 color-coded according to the effect: null in wheat; potentiation in green; inhibition in purple and  
373 intermediate (579) in cyan, the same color code applies to each panel. 577A and 577B denotes the  
374 insertion of AzF and BzF, respectively, at this particular site. **B** Simplified single binding site models of  
375 AMPAR gating. Open state ( $AR^*$ ) is green, shut states (including desensitized states  $D$ ,  $AD$  and  $AD_2$ )  
376 are red. Rates or states that were varied in each simulation are highlighted in yellow. **C** A 2-D plot,  
377 resembling the 2-D plot in panel A, but derived from simulations of the kinetic models described in  
378 panel B. Progressive alteration of the channel shutting and opening rate ( $\alpha$  and  $\beta$ , purple circles),  
379 changes in desensitization rates ( $d2$ , open green circles) or  $AD_2$  becoming conductive (filled green  
380 circles). Changes to both gating and desensitization are needed to obtain the intermediate behavior  
381 (cyan circles). **D** Simulated responses from kinetic models (indicated with colored circles as in panel B)  
382 used to construct panel C, with traces colored according to the rate constant indicated. **E** Gating  
383 modules in the AMPAR pore. The major classes of mutants form contiguous modules; a desensitization  
384 module (green; collar), a gating module (magenta; bundle crossing) and peripheral mutations with no  
385 effect (null mutants, wheat). The selectivity filter mutant with complex behavior is F579AzF (cyan).

### 386 **Complex role in receptor kinetics of the F579 site**

387 A complicated kinetic model was needed to mimic the position of F579AzF in the 2-D gating  
388 plot (Figure 7). Therefore, we reasoned that complex UV-driven changes in gating at this site  
389 might be detectable in patch clamp recordings. To address this point, we pursued a more  
390 detailed investigation of kinetics, including recovery from desensitization, at both an  
391 intermediate time point in cumulative UV exposure (~2 s) and after saturating exposure (8s).

392 Kymograms of the UV effects on peak current and steady-state response are shown in Figure  
393 8A. As in our initial analysis, peak current inhibition by UV was incomplete, reaching only  
394 about 75% (Figure 8A and Supplementary Table 3). This was also true for the non-desensitizing  
395 L483Y variant, indicating that reduced channel gating, rather than increased desensitization,  
396 was responsible for this inhibition. In these experiments, the rate of entry to desensitization  
397 was reduced by almost one third after saturating UV exposure time of 8s (from  $k_{des} = 130 \pm$   
398  $15 \text{ s}^{-1}$  to  $k_{des} = 45 \pm 10 \text{ s}^{-1}$ ,  $n = 9$ , Figure 8B), whereas intermediate cumulative exposure time  
399 of 2s showed desensitization rates similar to control ( $k_{des} = 110 \pm 10 \text{ s}^{-1}$ ). Paradoxically,  
400 steady-state currents activated by 10 mM glutamate increased to about 10% of the peak (Figure  
401 8B). Likewise, the deactivation rate following a 1 ms pulse of 10 mM glutamate was also  
402 substantially slowed (from  $1410 \pm 140 \text{ s}^{-1}$  to  $700 \pm 140 \text{ s}^{-1}$  (2s UV) and  $500 \pm 140 \text{ s}^{-1}$  (8s UV),  
403  $n = 9$ , Figure 8C). Both these effects on gating developed strongly at early stages of UV  
404 exposure (that is, after only 2 s).

405 As expected from our kinetic modelling, the effect on desensitization was not simple. To this  
406 end, also recovery from desensitization was slowed (from  $k_{rec} = 40 \pm 5 \text{ s}^{-1}$  to  $k_{rec} = 20 \pm 5 \text{ s}^{-1}$   
407 (2s UV) and  $k_{rec} = 15 \pm 5 \text{ s}^{-1}$  (8s UV),  $n = 9$ , Figure 9A-B). One caveat for this measurement is  
408 that control measurements on the GluA2 WT receptor, expressed on the background of AzF  
409 and its cognate synthetase, showed a small slowing of recovery after UV exposure (from  $55 \pm$   
410  $4 \text{ s}^{-1}$  to  $38 \pm 2 \text{ s}^{-1}$ ,  $p = 0.008$ , paired t-test,  $n = 9$  patches, Supplementary Table 2). The effect  
411 on F579AzF mutants was much more substantial, and quite different to control measurements,  
412 with a “quiescent phase” where no effective response was detected for about 30 ms following  
413 the conditioning pulse (Figure 9A). Measuring recovery was hampered by the peak current  
414 inhibition but also by the development of an unusual long decay in the current after the  
415 desensitizing pulse. This “off-relaxation” following desensitization was much slower after only  
416 a brief UV exposure, (from  $k_{off} = 150 \pm 60 \text{ s}^{-1}$  to  $k_{off} = 30 \pm 5 \text{ s}^{-1}$  (2s UV) and  $k_{off} = 35 \pm 5 \text{ s}^{-1}$   
417 (8s UV),  $n = 9$ , Figure 9C). These measurements also revealed that the steady-state current  
418 increased in absolute magnitude. There was no concomitant effect on the resting state  
419 conductance – the patches did not become leaky.

420 By comparing effects on kinetics at intermediate and saturating UV exposures, it was clear that  
421 the onset of UV-driven effects in F579AzF was not coherent. The slowing effect on the tail  
422 current ( $k_{off}$ ) and deactivation as well as the slowing of recovery from desensitization were  
423 pronounced already at 2 s, whereas effects on the steady-state current and the rate of entry to  
424 desensitization developed later (Figure 10A). These distinct time courses are further evidence  
425 that photoactivation of the F579AzF mutant has an unprecedented effect on multiple functional  
426 states of the AMPAR. This observation is consistent with a high structural variability at the  
427 selectivity filter region (at the cytoplasmic end of the channel; Figure 10B and C) both between  
428 and within states.

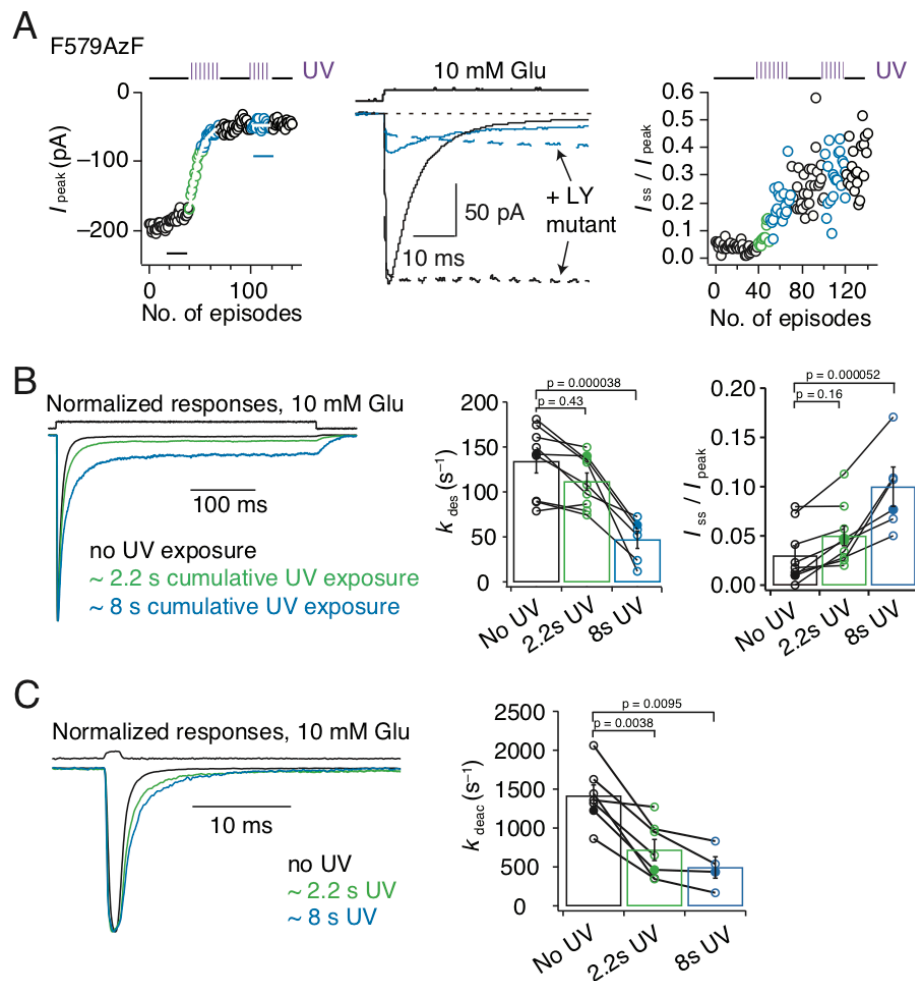

429 **Figure 8. Broad role of the M2 segment in activation and desensitization.**

430 **A** Kymograms illustrating the time course of incomplete inhibition for GluA2-F579AzF peak current  
 431 responses to 10 mM glutamate (*left*) and increase in the relative steady-state current (*right*). Example  
 432 current traces (*middle*) representing averages of 10 responses to glutamate before UV exposure (black  
 433 trace) and after UV exposure (cyan) in desensitized state (solid lines) and fully active state  
 434 (corresponding L483Y mutant, dotted line). **B** Exemplary normalized traces for desensitizing responses  
 435 to a 400 ms glutamate pulse, before (black), during (2.2 s, green) and after (8 s, blue) UV exposure.  
 436 Bar graph shows rates of desensitization, relative steady-state current ( $I_{\text{ss}}/I_{\text{peak}}$ )  $\pm$  SEM before, after 2.2  
 437 s and after 8 s of UV exposure from paired recordings:  $k_{\text{des}} = 130 \pm 15 \text{ s}^{-1}$  ( $n = 9$ ),  $k_{\text{des}} = 110 \pm 10 \text{ s}^{-1}$   
 438 ( $n = 9$ ) and  $k_{\text{des}} = 50 \pm 10 \text{ s}^{-1}$  ( $n = 6$ );  $I_{\text{ss}}/I_{\text{peak}} = 0.03 \pm 0.01$  ( $n = 9$ ),  $I_{\text{ss}}/I_{\text{peak}} = 0.05 \pm 0.01$  ( $n = 9$ )  
 439 and  $I_{\text{ss}}/I_{\text{peak}} = 0.1 \pm 0.02$  ( $n = 6$ ). **C** Exemplary normalized traces for responses to a 1 ms application  
 440 of 10 mM glutamate, with the same color code as panel B. Bar graph shows rates of deactivation  
 441 before, during and after UV, respectively:  $k_{\text{deac}} = 1400 \pm 140 \text{ s}^{-1}$  ( $n = 7$ ),  $k_{\text{deac}} = 700 \pm 140 \text{ s}^{-1}$  ( $n = 7$ )  
 442 and  $k_{\text{deac}} = 500 \pm 140 \text{ s}^{-1}$  ( $n = 4$ ). Solid symbols indicate the rates for the responses shown in the left  
 443 panels. Error bars represent SEM.

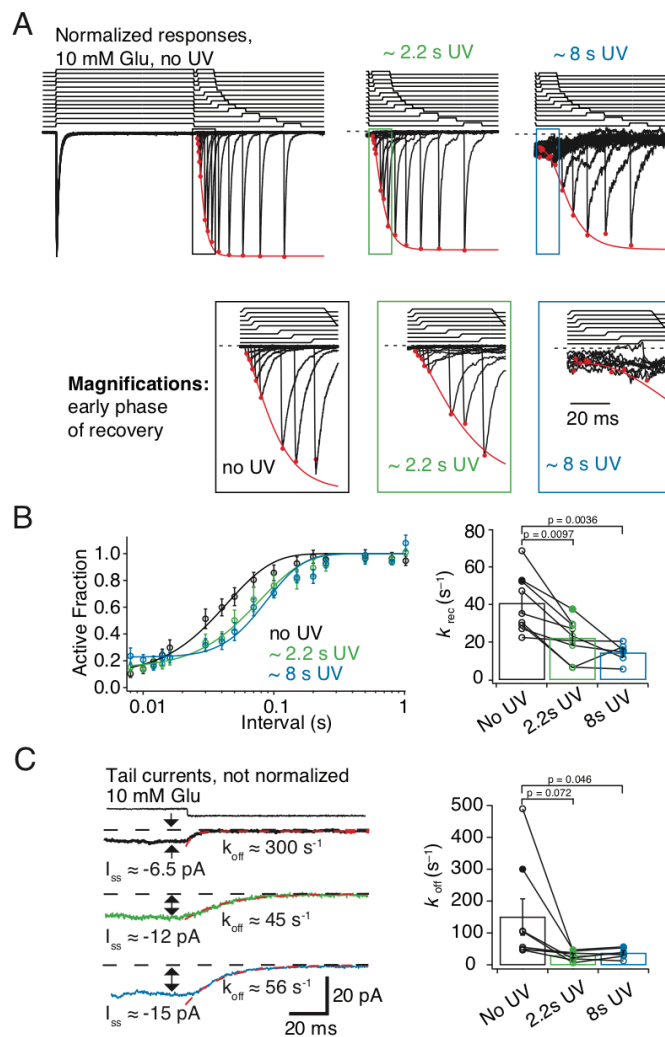

444 **Figure 9. Role of the M2 segment in desensitized states.**

445 **A** Exemplary normalized traces for recovery from desensitization before, during (2.2 s, green) and after  
 446 (8 s, blue) UV exposure. Time courses of glutamate applications are shown above the traces. Red circles  
 447 indicate the peak of the response, fitted with a recovery function (red line). Apparent increase in noise  
 448 following 8 s of UV exposure appears from performing a zoom on the trace, to be able to find the  
 449 remaining glutamate induced current. **B** Recovery curves from pooled data are shifted to the right with  
 450 cumulative UV exposure. Bar graph summarizing paired recovery from desensitization protocols before,  
 451 during and after 8 s of UV exposure. Solid symbols refer to the patch in panel A. Recovery rates  $\pm$  SEM  
 452  $k_{rec} = 40 \pm 5 s^{-1}$  ( $n = 9$ ),  $20 \pm 3 s^{-1}$  ( $n = 9$ ) and  $k_{rec} = 15 \pm 2 s^{-1}$  ( $n = 6$ ) before, during and after UV,  
 453 respectively. **C** Exemplary traces for tail currents after desensitization. Bar graph of decays after the  
 454 steady-state current before, during and after UV exposures, with solid symbols referring to the traces  
 455 shown in the left panel. Deactivation rates  $\pm$  SEM are  $k_{off} = 150 \pm 60 s^{-1}$  ( $n = 9$ ),  $k_{off} = 30 \pm 5 s^{-1}$  ( $n = 9$ )  
 456 and  $k_{off} = 35 \pm 10 s^{-1}$  ( $n = 6$ ) before, during and after UV, respectively. Error bars represent SEM.

## 457 Discussion

458 Despite the recent release of structures of activated GluA2 receptors (Twomey et al., 2017a)  
 459 (Chen et al., 2017) to compare with cognate closed state structures (Sobolevsky et al., 2009;  
 460 Chen et al., 2014; Dürr et al., 2014), the nature and complexity of conformational changes  
 461 occurring at the level of the TMD of AMPARs during gating remains unclear. Previous work  
 462 supports the idea that M3 lines the pore and an upper hydrophobic box (Kuner et al., 2003;  
 463 Alsaloum et al., 2016) and M2 comprises the selectivity filter region (Kuner et al., 2001).  
 464 Conversely, the roles of the M1 and M4 helices are less well studied. In this work, site-specific  
 465 incorporation of photoactivatable crosslinkers (Klippenstein et al., 2014) enabled access to the  
 466 entire TMD of homomeric GluA2 AMPARs. A key advantage of this method is that function can  
 467 be assessed before, during and after the photoactivation. Critically, crosslinking potential was  
 468 independent of solvent exposure, allowing us to build a relatively unbiased map of functional  
 469 elements in the TMD and relate these elements to structural data. This factor was decisive in  
 470 revealing complex relationships between the Pre-M1 and M4 helices and the selectivity filter  
 471 region and channel activation and desensitization.

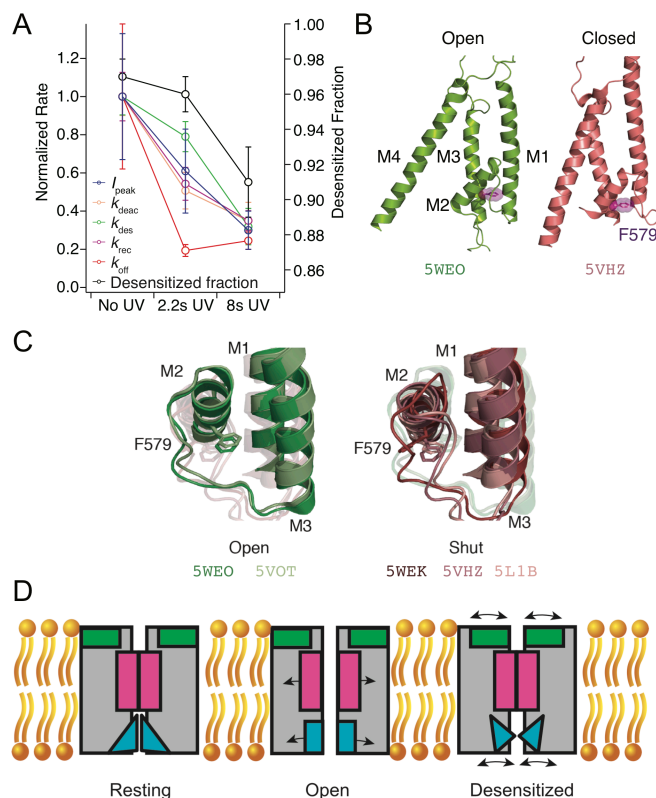

472  
 473

### 474 Figure 10. Putative AMPA receptor gating modules.

475 **A** The time courses of UV-dependent gating changes in the F579AzF mutant (details in Figure 8 and 9).  
 476 Desensitization changes (desensitized fraction and  $k_{des}$ ) developed over longer cumulative exposures  
 477 than deactivation ( $k_{deac}$ ) or the long decay after a desensitized pulse ( $k_{off}$ ). For the inhibition of the peak  
 478 current ( $I_{peak}$ ) before, during (2.2 s) and after (8s) UV exposure:  $p = 0.34$  (paired t-test between no and  
 479 2.2s UV) and  $p = 0.0095$  (repeated measures ANOVA). **B** The F579 site is located immediately behind  
 480 the selectivity filter. Overlay of the TMD of a single subunit from closed (red) and open (green) GluA2  
 481 channel, with the four transmembrane helices (M1-4) indicated. **C** Overlays of open and closed channel  
 482 structures showing F579 in multiple conformations. The PDB codes are indicated in the corresponding  
 483 colors. **D** Scheme of gating modules. Channel opening requires a “bloom” at the M3 segment (gating  
 484 module, magenta), and a conductive selectivity filter (cyan). Desensitization is accompanied by  
 485 movements of the desensitization module (green) and potentially by structural dynamics of the  
 486 selectivity filter.



487 The incorporation of bulky AzF and BzF residues had at most minor effects on the kinetics of  
488 channel activation, gating or desensitization of GluA2 before exposure to UV. The facility of  
489 these UAAs to be incorporated into the TMD depended on their environment and chemistry  
490 (Figure 1). Unsurprisingly, sites proximal to the phospholipid membrane (at the TMD  
491 periphery) were more likely to provide enough space for the insertion of both AzF and BzF,  
492 whereas the ion channel core was less permissive. However, the periphery was not insensitive  
493 to insertion of AzF and BzF, and I798AzF in M4 had, in contrast to other sites, basal kinetics  
494 (that is, before UV exposure) that differed from GluA2 WT. Following UV exposure, long lived  
495 (> 50 ms) single channel bursts could be observed for the I798AzF mutant (Supplementary  
496 Figure 8). These findings augment previous studies showing that insertion of tryptophan in  
497 sites of the peripheral TMD can disrupt transmembrane interactions and receptor  
498 tetramerization (Salussolia et al., 2011; Salussolia et al., 2013). At sites that were permissive,  
499 we found that approximately 50% of the AMPARs rescued by incorporation of AzF showed a  
500 change in channel gating upon UV exposure, while incorporation of BzF only showed an UV-  
501 induced effect in three cases out of 11 (Figure 1), two of which were at the membrane  
502 periphery. This superior capability of AzF in the TMD might be due to its greater mobility to  
503 rotate and cross-link to nearby carbohydrogen, relative to BzF (Tian and Ye, 2016). Overall,  
504 UV-induced control of receptor activity was independent of the functional state and which  
505 membrane helix harboured the AzF residue. These observations favour the idea that all four  
506 membrane segments rearrange upon receptor activation in order to open the channel pore, or  
507 to permit receptor desensitization. The wide range of potential interacting partners for AzF or  
508 BzF in each state of activation may have precluded state-dependency. It is conceivable that UV  
509 illumination in different states result in crosslinking to various membrane segments or lipid  
510 parts of the bilayer, to yield the same effects.

511 Previous work suggested that a disulfide bond between the Pre-M1 and M4 helices could inhibit  
512 channel opening (Yelshanskaya et al., 2017). Four mutants clustered at the collar region (F515,  
513 L518, Y797, I798) had similar UV-dependent effects, unique to this gating module (Figure 7E,  
514 10D). Our functional and biochemical data indicate that an adventitious crosslink, or  
515 interactions between Pre-M1 and M4, can also have a potentiation effect, and block  
516 desensitization (Figure 4). When BzF was incorporated in the likely solvent-exposed sites in  
517 the Pre-M1 helix (F515BzF and L518BzF) BzF crosslinking potentiated receptor currents  
518 (Figure 4). Biochemical analysis showed no intersubunit crosslinks, but we found a robust UV-  
519 induced increase in intrasubunit crosslinking, by quantifying monomeric protection of GluA2-  
520 F515BzF subunits cleaved by TEV protease. This result indicates a rotation of the Pre-M1  
521 segment towards M4 of the same subunit (Figure 5D). This type of interaction has also been  
522 speculated for NMDA receptors (NMDARs) (Amin et al., 2017; Ogden et al., 2017).  
523 Furthermore, while NMDAR M4 segments have subunit-specific effects on desensitization, it  
524 has been shown that the extreme intracellular end of AMPAR M4 segments only contribute  
525 weakly to desensitization (Amin et al., 2017). Desensitization after photoactivation of Y797AzF  
526 was strongly reduced. Comparing this to our recent FRET data suggesting the M4 (as assayed  
527 from the C-terminal movement) is likely to move during gating, desensitization and without  
528 pore opening (Zachariassen et al., 2016), a wider role for peripheral interactions to modulate  
529 AMPAR function appears likely. We did not detect crosslinking either within or between  
530 subunits for Y797AzF. The effect in desensitization might thus be explained either by ring  
531 expansion of the AzF having a steric effect or by crosslinking to a lipid. We recently showed  
532 that interaction between the LBD-M4 linker and Stargazin is sufficient for modulation of GluA2  
533 (Riva et al., 2017), thus raising the prospect that the perturbation at this site in M4 (Y797AzF),  
534 pointing away from the core of the channel, could be related to the changes in receptor function  
535 effected by auxiliary proteins, which in fact interact with the M4 and M1 of the AMPAR (Zhao  
536 et al., 2016; Twomey et al., 2017a). Notably, in some patches, we could detect that following  
537 photoactivation of AzF at position 798, glutamate could activate long bursts of channel

538 openings with high open probability (Supplementary Figure 8), much like the incorporation of  
539 Stargazin produces (Tomita et al., 2005).

540 A distinct group of mutants flanking the bundle crossing (Figures 7E and 10D) showed  
541 properties likely resulting from an inhibition of the channel opening reaction, either by slowing  
542 channel opening, or destabilisation of the open state. F608 in the M3 helix showed the most  
543 potent inhibition. A kink at A618 allows the upper segment of M3 to move substantially upon  
544 channel opening [Twomey PMID: 28737760], but F608 seems to move much less  
545 (Supplementary Figure 7). The fast rate of UV-inhibition at this site might therefore simply  
546 reflect the necessity of M3 movement to open/close the channel.

547 Both the structural and functional analyses of crosslinking sites indicated that F579AzF, located  
548 in close proximity to the selectivity filter at the base of the M2 helix, has a special role in gating  
549 of the receptor. In this context, the variation of the selectivity filter structure (and likewise its  
550 disordered nature in some other structures), including between closed state structures, and  
551 steric hindrance of the open channel selectivity filter structure by F579 are of interest (Figure  
552 10C). Inhibition of the peak current was in the case of F579AzF accompanied by a large  
553 increase in the steady-state current. Mimicking these changes in a kinetic model required  
554 concurrent destabilization of both the open state and the desensitized state. The idea that  
555 desensitization can be affected by a residue deep in the channel in the M2 helix, was confirmed  
556 by the slowing of recovery from desensitization measured after UV exposure of GluA2-F579AzF  
557 (Figure 9). Notably, recovery happens entirely whilst the channel is closed. Therefore,  
558 crosslinking at this site had a dual effect on desensitization, slowing both entry and recovery  
559 (2.9-fold each), as well as separately biasing the open-closed equilibrium (because the peak  
560 current was substantially inhibited). Finally, we note that comparing our results to structures  
561 directly was generally unproductive (Supplementary Figure 6), whereas we readily discerned  
562 functional groups of residues by analyzing a 2-D plot of electrophysiological properties (Figure  
563 7). This 2-D plot of peak vs. steady-state responses presumably gives insight because it  
564 compares the energies of modifying channel opening transitions and modifying receptor  
565 desensitization.

566 Overall, the effects of the F579AzF mutation following UV exposure are complex, and the  
567 extent of changes to the current have distinct dependencies on UV exposure. Our results do not  
568 distinguish between subunit dosage effects, that develop with a different dependence on the  
569 number of reacted subunits, or trapping of distinct structural forms. More work will be needed  
570 to dissect how the different UV-dependent changes occur. The model that gave the best  
571 description of the F579AzF data included progressive shift of the desensitized state towards a  
572 small conductance. In practice, such a phenomenon (the development of a new conductive  
573 state with UV exposure) may not be related to desensitization, but the relaxation from the  
574 steady-state current (from the tail current kinetics, Figure 9C) matched that of recovery from  
575 desensitization. However, our observations strongly corroborate the idea that the selectivity  
576 filter of AMPARs is as dynamic a structure as it is in simple tetrameric channels, with distinct  
577 arrangements between states (Twomey et al., 2017a). This property might allow the selectivity  
578 filter region to function as a second ion gate, closing and opening the pore between certain  
579 functional states as in other tetrameric channels. Further work will be required to assess  
580 whether state-dependent ion transit through the selectivity filter is a feature of the AMPAR  
581 transmembrane domain.

## 582 **Materials and Methods**

### 583 **Molecular Biology**

584 The aminoacyl-tRNA-synthetase and tRNA constructs for Human embryonic kidney (HEK) cell  
585 expression (Ye et al., 2008, Ye et al., 2009) were kind gifts from Thomas Sakmar (Rockefeller).  
586 For electrophysiological studies we used the pRK5 expression vector encoding the flip splice  
587 variant of the rat GluA2 subunit containing a Q at the Q/R-filter, followed by IRES and eGFP.  
588 The mutation Y40TAG was introduced into eGFP to act as a reporter of rescue (described in  
589 Klippenstein et al. 2014). Amber stop codons were introduced by overlap PCR and confirmed  
590 by double-stranded DNA sequencing. To study the active state of GluA2, a mutation (L483Y)  
591 was introduced that blocks receptor desensitization and stabilises an open state. (Sun et.al.,  
592 2002)

593 The pRK5 vector was also used for biochemical experiments, but for this purpose the GluA2  
594 subunit carried a C-terminal FLAG-tag epitope (Lau et al., 2013) for purification and three  
595 cysteines deleted (C190A, C436S, C528S) to lower background subunit dimerization  
596 (Klippenstein et al., 2014). The TEV protease recognition site 'ENLYFQGS' was inserted  
597 immediately before W572 in the M1-M2 intracellular loop with the native E571 being part of  
598 the TEV site (Xu et al., 2013).

599

### 600 **Cell culture and transfection**

601 HEK293T for biochemical experiments and HEK293 cells for electrophysiological experiments  
602 were maintained in Minimum Essential Medium (MEM, Sigma-Aldrich) supplemented with  
603 10% serum and 5% penicillin/streptomycin and grown at 37°C with 5% CO<sub>2</sub>. HEK293 and  
604 HEK293T cells were transiently transfected using polyethylenimine (PEI) in a 1:3 ratio (v/v;  
605 DNA/PEI) one day after cells were seeded. To suppress the amber stop codon, GluA2 mutants  
606 were co-expressed with vectors encoding mutated tRNA and synthetase for either AzF or BzF  
607 in the mass ratio 4:1:1. After six hours of incubation, the transfection medium was replaced by  
608 MEM supplemented with AzF (0.5 mM) or BzF (1 mM). We dissolved BzF (Bachem Holding)  
609 in 1 M HCl and AzF (Chem-Impex International) in 1 M NaOH, which was immediately added  
610 to pre-warmed MEM containing 10% serum. Media supplemented with BzF or AzF were  
611 adjusted to pH 7.3 and filter-sterilized (0.22 μm PVDF filter) before use (Ye et al., 2009; Hino  
612 et al., 2006). Control experiments on wild-type receptors were done on the background of the  
613 AzF or BzF synthetase and the UAA medium.

614

### 615 **Electrophysiology**

616 Patch clamp recordings of outside-out patches from HEK cells expressing mutant and wild-type  
617 glutamate receptors were performed 2-3 days after transfection. The external solution was  
618 composed as follows (mM): 150 NaCl, 0.1 MgCl<sub>2</sub>, 0.1 CaCl<sub>2</sub>, 5 HEPES. The pipette solution  
619 contained the following (mM): 115 NaCl, 0.5 CaCl<sub>2</sub>, 1 MgCl<sub>2</sub>, 10 Na<sub>2</sub>ATP, 10 NaF, 5 Na<sub>4</sub>BAPTA,  
620 5 HEPES. Both solutions were titrated with NaOH to pH 7.3. Glutamate was diluted in the  
621 external solution and was applied to outside-out patches using a custom-made four-barrel glass  
622 perfusion tool (Vitrocom). For most experiments we used 10 mM glutamate to activate, but for  
623 some experiments, 1 mM glutamate was applied with no detectable differences in UV induced  
624 effects. The perfusion tool was mounted on a piezo-electric transducer (Physik Instrument),  
625 which was controlled via the digitizer interface (Instrutech ITC-18, HEKA Instrument).  
626 Borosilicate glass electrodes had resistance of 3-5 MΩ. Patches were clamped at -40 to -60 mV.  
627 Currents were filtered at 10 kHz and recorded at 40 kHz sampling rate using Axograph X  
628 (Axograph Scientific, Sydney, Australia). Macroscopic currents were elicited by applying the  
629 ligand for 400 ms. We exposed patches to UV light via epi-illumination from a Rapp UVICO  
630 source with a shutter under computer control. For state-dependent receptor trapping, patches  
631 were exposed to UV light when the receptor was either in the resting (before glutamate  
632 application), desensitised (during glutamate application) or in the active state (during  
633 glutamate application on L483Y-mutants) for 50 ms to 200 ms in each episode. It was not

634 possible to record macroscopic currents from GluA2-F608AzF harbouring the L483Y mutation,  
635 so in this case 100  $\mu$ M cyclothiazide (Ascent Scientific) was applied to trap the receptor in an  
636 active state. All chemicals were purchased from Roth unless otherwise noted.

637

### 638 **Kinetic Modelling**

639 Simulated responses to glutamate for a set of kinetic models were generated using the Aligator  
640 scripts ([www.github.com/aplested](http://www.github.com/aplested)). Families of responses were generated by changing  
641 individual rate constants progressively, and correcting for microscopic reversibility on loops.  
642 These were adapted from previously used code to allow the conductance of states to change  
643 across a set of simulated currents, in order to mimic the desensitised state becoming  
644 conductive.

645

### 646 **Structural Analysis**

647 We aligned the C-alpha atoms of residues 510-620 and 795-810 from chains A & C of GluA2  
648 from six CryoEM and crystal structures: 5VOT, 5WEO (open), 5WEK, 5L1B (resting), 5VHZ,  
649 5V0V (desensitised) (Yelshanskaya et al., 2016b; Twomey et al., 2017a; Twomey et al.,  
650 2017b; Chen et al., 2017) using the PyMol command "Align". The selection of residues was  
651 interactively checked and chosen to give the most reliable alignment across all four subunits.  
652 Distances were taken between C-alpha atoms in the same chains for separate structures (for  
653 residue displacements), and between diametrically opposed chains in the same structures (for  
654 axial distances). Scripting was done in the Anaconda distribution of Python supplied with  
655 PyMol 2.0 (Schrödinger).

656

### 657 **Biochemistry**

658 For biochemical experiments HEK293T cells were plated in dishes of 10 cm diameter and  
659 transfected as described above (cell culture and transfection). Three days after transfection the  
660 cells were exposed to UV light ( $\sim 300$  W/m<sup>2</sup>) on ice in a ventilated chamber (Luzchem, LZC-  
661 1) for 2-15 minutes. UV induced crosslinking was performed in the presence of 40 mM N-ethyl-  
662 maleimide (NEM, Thermo Fisher Scientific), to reduce spurious dimer formation from free  
663 cysteines following denaturation. Cells were harvested immediately after UV exposure, lysed  
664 in buffer containing 1% dodecylmaltoside (Glycon Biochemicals) and 40 mM NEM. Lysates  
665 were incubated with ANTI-FLAG M2 Affinity Gel (Sigma-Aldrich) and column purified (illustra  
666 MicroSpin, GE Healthcare). NEM inhibits TEV protease, therefore it was necessary to wash the  
667 samples extensively during purification to remove NEM before adding TEV protease for  
668 overnight digestion (TEV Protease, Protean). The second elution round was loaded on 4-12%  
669 NuPAGE Novex gels (Invitrogen) and run in reducing conditions in presence of 500 mM 2-  
670 Mercaptoethanol (Sigma-Aldrich) at 200 mV for 2 h. Transfer of the proteins to PVDF  
671 membranes (Immobilon- FL Millipore) was done using XCell surelock mini-cell and XCell II  
672 Blot Module (Invitrogen) as described in the manufacturer's instructions. To enable  
673 quantitative detection of N- and C-terminal reactive bands in the same blot, membranes were  
674 incubated overnight at 4°C with polyclonal rabbit anti-GluR2/3 antibody (1:1000, Millipore)  
675 and monoclonal mouse anti-FLAG M2 antibody (1:1000, Sigma-Aldrich) respectively. The day  
676 after, infra-red dyes conjugated to secondary antibodies (IRDye 800CW Goat anti-mouse and  
677 IRDye 680RD Goat anti-Rabbit, Li-COR) were applied to the membranes for 1h at room  
678 temperature. The signal produced was detected on a LI-COR Odyssey Fc imager and  
679 quantified using ImageStudioLite2. As a control of readthrough the constructs containing an  
680 amber TAG stop codon at various positions in the GluA2 TMD were co-expressed with the tRNA  
681 and tRNA-synthetase in the absence of UAA, whereas WT controls were co-expressed with the  
682 tRNA and tRNA-synthetase in presence of UAA, to check for adventitious incorporation of UAA.

683

### 684 **Electrophysiology data analysis**

685 Deactivation and desensitization were fit with either single or double exponential functions.  
686 To measure recovery from desensitization, two pulses of glutamate were applied in one episode  
687 with varying interpulse intervals. Recovery data were fit with a Hodgkin-Huxley type function  
688 (Carbone and Plested, 2012) with a slope of 2, except where noted. Kymograms of peak current  
689 reduction were fit with single exponential decay function. Statistical significance was assessed  
690 with Student's *t* test, using either pairwise comparisons for different values from a single patch  
691 recording or unpaired tests for comparisons between mutants or different conditions. For  
692 multiple comparisons of the measurements before, during and after UV exposure of the  
693 F579AzF mutant, we performed repeated measures ANOVA.

#### 694 **Acknowledgements**

695 We are grateful to Thomas Sakmar (Rockefeller University) for providing the RNA-synthetase  
696 and tRNA plasmids. This work was funded by the Deutsche Forschungsgemeinschaft (DFG)  
697 Cluster of Excellence "NeuroCure" (EXC-257), DFG PL619-2 and SFB/TRR 186 to A.J.R.P.  
698 M.H.P. was recipient of fellowships from the Carlsberg foundation and the Danish Council for  
699 Independent Research. V.K. and A.P. both received stipends from the NeuroCure Cluster.

700

#### 701 **Competing interests**

702 The authors declare no financial and non-financial competing interests.

703

#### 704 **Author contributions**

705 All authors designed the experiments. All authors performed the experiments and/or analysed  
706 data. All authors read the manuscript. M.H.P., A.P. and A.J.R.P. wrote and edited the  
707 manuscript.

## 708 **Bibliography**

- 709 Ahmed, A. H., Wang, S., Chuang, H.-H., and Oswald, R. E. (2011). Mechanism of AMPA  
710 receptor activation by partial agonists: disulfide trapping of closed lobe conformations. *J Biol*  
711 *Chem* *286*, 35257-35266.
- 712 Alsaloum, M., Kazi, R., Gan, Q., Amin, J., and Wollmuth, L. P. (2016). A Molecular Determinant  
713 of Subtype-Specific Desensitization in Ionotropic Glutamate Receptors. *J Neurosci* *36*, 2617-  
714 2622.
- 715 Amin, J. B., Salussolia, C. L., Chan, K., Regan, M. C., Dai, J., Zhou, H. X., Furukawa, H., Bowen,  
716 M. E., and Wollmuth, L. P. (2017). Divergent roles of a peripheral transmembrane segment in  
717 AMPA and NMDA receptors. *J Gen Physiol* *149*, 661-680.
- 718 Armstrong, N., Jasti, J., Beich-Frandsen, M., and Gouaux, E. (2006). Measurement of  
719 conformational changes accompanying desensitization in an ionotropic glutamate receptor.  
720 *Cell* *127*, 85-97.
- 721 Baranovic, J., Chebli, M., Salazar, H., Carbone, A. L., Faelber, K., Lau, A. Y., Daumke, O., and  
722 Plested, A. J. (2016). Dynamics of the Ligand Binding Domain Layer during AMPA Receptor  
723 Activation. *Biophys J* *110*, 896-911.
- 724 Blunck, R., Cordero-Morales, J. F., Cuello, L. G., Perozo, E., and Bezanilla, F. (2006). Detection  
725 of the opening of the bundle crossing in KcsA with fluorescence lifetime spectroscopy reveals  
726 the existence of two gates for ion conduction. *J Gen Physiol* *128*, 569-581.
- 727 Carbone, A. L., and Plested, A. J. R. (2012). Coupled control of desensitization and gating by  
728 the ligand binding domain of glutamate receptors. *Neuron* *74*, 845-857.
- 729 Carbone, A. L., and Plested, A. J. R. (2016). Superactivation of AMPA receptors by auxiliary  
730 proteins. *Nat Commun* *7*, 10178.
- 731 Chen, L., Dürr, K. L., and Gouaux, E. (2014). X-ray structures of AMPA receptor-cone snail  
732 toxin complexes illuminate activation mechanism. *Science* *345*, 1021-1026.
- 733 Chen, S., Zhao, Y., Wang, Y., Shekhar, M., Tajkhorshid, E., and Gouaux, E. (2017). Activation  
734 and Desensitization Mechanism of AMPA Receptor-TARP Complex by Cryo-EM. *Cell* *170*, 1234-  
735 1246.e14.
- 736 Contreras, J. E., Srikumar, D., and Holmgren, M. (2008). Gating at the selectivity filter in cyclic  
737 nucleotide-gated channels. *Proceedings of the National Academy of Sciences* *105*, 3310.
- 738 del Camino, D., and Yellen, G. (2001). Tight Steric Closure at the Intracellular Activation Gate  
739 of a Voltage-Gated K<sup>+</sup> Channel. *Neuron* *32*, 649-656.
- 740 Devaraneni, P. K., Komarov, A. G., Costantino, C. A., Devereaux, J. J., Matulef, K., and  
741 Valiyaveetil, F. I. (2013). Semisynthetic K<sup>+</sup> channels show that the constricted conformation  
742 of the selectivity filter is not the C-type inactivated state. *Proc Natl Acad Sci U S A* *110*, 15698-  
743 15703.
- 744 Dürr, K. L., Chen, L., Stein, R. A., De Zorzi, R., Folea, I. M., Walz, T., Mchaourab, H. S., and  
745 Gouaux, E. (2014). Structure and Dynamics of AMPA Receptor GluA2 in Resting, Pre-Open,  
746 and Desensitized States. *Cell* *158*, 778-792.
- 747 Hino, N., Hayashi, A., Sakamoto, K., and Yokoyama, S. (2006). Site-specific incorporation of  
748 non-natural amino acids into proteins in mammalian cells with an expanded genetic code. *Nat*  
749 *Protoc* *1*, 2957-2962.
- 750 Horning, M. S., and Mayer, M. L. (2004). Regulation of AMPA receptor gating by ligand binding  
751 core dimers. *Neuron* *41*, 379-388.
- 752 Klippenstein, V., Hoppmann, C., Ye, S., Wang, L., and Paoletti, P. (2017). Optocontrol of  
753 glutamate receptor activity by single side-chain photoisomerization. *Elife* *6*,
- 754 Klippenstein, V., Ghisi, V., Wietstruk, M., and Plested, A. J. R. (2014). Photoinactivation of  
755 glutamate receptors by genetically encoded unnatural amino acids. *J Neurosci* *34*, 980-991.
- 756 Kuner, T., Beck, C., Sakmann, B., and Seeburg, P. H. (2001). Channel-lining residues of the  
757 AMPA receptor M2 segment: structural environment of the Q/R site and identification of the  
758 selectivity filter. *J Neurosci* *21*, 4162-4172.

- 759 Kuner, T., Seeburg, P. H., and Guy, H. R. (2003). A common architecture for K<sup>+</sup> channels and  
760 ionotropic glutamate receptors. *Trends Neurosci* 26, 27-32.
- 761 Labro, A. J., Cortes, D. M., Tilegenova, C., and Cuello, L. G. (2018). Inverted allosteric coupling  
762 between activation and inactivation gates in K<sup>+</sup> channels. *Proc Natl Acad Sci U S A* 115, 5426-  
763 5431.
- 764 Lau, A. Y., Salazar, H., Blachowicz, L., Ghisi, V., Plested, A. J. R., and Roux, B. (2013). A  
765 conformational intermediate in glutamate receptor activation. *Neuron* 79, 492-503.
- 766 Martin, G. M., Rex, E. A., Devaraneni, P., Denton, J. S., Boodhansingh, K. E., DeLeon, D. D.,  
767 Stanley, C. A., and Shyng, S. L. (2016). Pharmacological Correction of Trafficking Defects in  
768 ATP-sensitive Potassium Channels Caused by Sulfonylurea Receptor 1 Mutations. *J Biol Chem*  
769 291, 21971-21983.
- 770 Murray, C. I., Westhoff, M., Eldstrom, J., Thompson, E., Emes, R., and Fedida, D. (2016).  
771 Unnatural amino acid photo-crosslinking of the IKs channel complex demonstrates a  
772 KCNE1:KCNQ1 stoichiometry of up to 4:4. *Elife* 5,
- 773 Naganathan, S., Ye, S., Sakmar, T. P., and Huber, T. (2013). Site-specific epitope tagging of G  
774 protein-coupled receptors by bioorthogonal modification of a genetically encoded unnatural  
775 amino acid. *Biochemistry* 52, 1028-1036.
- 776 Oelstrom, K., Goldschen-Ohm, M. P., Holmgren, M., and Chanda, B. (2014). Evolutionarily  
777 conserved intracellular gate of voltage-dependent sodium channels. *Nat Commun* 5, 3420.
- 778 Ogden, K. K., Chen, W., Swanger, S. A., McDaniel, M. J., Fan, L. Z., Hu, C., Tankovic, A.,  
779 Kusumoto, H., Kosobucki, G. J., Schulien, A. J., Su, Z., Pecha, J., Bhattacharya, S., Petrovski,  
780 S., Cohen, A. E., Aizenman, E., Traynelis, S. F., and Yuan, H. (2017). Molecular Mechanism of  
781 Disease-Associated Mutations in the Pre-M1 Helix of NMDA Receptors and Potential Rescue  
782 Pharmacology. *PLoS Genet* 13, e1006536.
- 783 Posson, D. J., McCoy, J. G., and Nimigeon, C. M. (2013). The voltage-dependent gate in MthK  
784 potassium channels is located at the selectivity filter. *Nat Struct Mol Biol* 20, 159-166.
- 785 Riva, I., Eibl, C., Volkmer, R., Carbone, A. L., and Plested, A. J. (2017). Control of AMPA  
786 receptor activity by the extracellular loops of auxiliary proteins. *Elife* 6,
- 787 Salussolia, C. L., Corrales, A., Talukder, I., Kazi, R., Akgul, G., Bowen, M., and Wollmuth, L. P.  
788 (2011). Interaction of the M4 segment with other transmembrane segments is required for  
789 surface expression of mammalian  $\alpha$ -amino-3-hydroxy-5-methyl-4-isoxazolepropionic acid  
790 (AMPA) receptors. *J Biol Chem* 286, 40205-40218.
- 791 Salussolia, C. L., Gan, Q., Kazi, R., Singh, P., Allopenna, J., Furukawa, H., and Wollmuth, L. P.  
792 (2013). A eukaryotic specific transmembrane segment is required for tetramerization in AMPA  
793 receptors. *J Neurosci* 33, 9840-9845.
- 794 Sobolevsky, A. I., Yelshansky, M. V., and Wollmuth, L. P. (2004). The outer pore of the  
795 glutamate receptor channel has 2-fold rotational symmetry. *Neuron* 41, 367-378.
- 796 Sobolevsky, A. I., Rosconi, M. P., and Gouaux, E. (2009). X-ray structure, symmetry and  
797 mechanism of an AMPA-subtype glutamate receptor. *Nature* 462, 745-756.
- 798 Sobolevsky, A. I., Yelshansky, M. V., and Wollmuth, L. P. (2003). Different gating mechanisms  
799 in glutamate receptor and K<sup>+</sup> channels. *J Neurosci* 23, 7559-7568.
- 800 Sobolevsky, A. I., Yelshansky, M. V., and Wollmuth, L. P. (2005). State-dependent changes in  
801 the electrostatic potential in the pore of a GluR channel. *Biophys J* 88, 235-242.
- 802 Sun, Y., Olson, R., Horning, M., Armstrong, N., Mayer, M., and Gouaux, E. (2002). Mechanism  
803 of glutamate receptor desensitization. *Nature* 417, 245-253.
- 804 Thompson, J., and Begenisich, T. (2012). Selectivity filter gating in large-conductance Ca(2+)-  
805 activated K<sup>+</sup> channels. *J Gen Physiol* 139, 235-244.
- 806 Tian, M., and Ye, S. (2016). Allosteric regulation in NMDA receptors revealed by the genetically  
807 encoded photo-cross-linkers. *Sci Rep* 6, 34751.
- 808 Tilegenova, C., Cortes, D. M., and Cuello, L. G. (2017). Hysteresis of KcsA potassium channel's  
809 activation- deactivation gating is caused by structural changes at the channel's selectivity filter.  
810 *Proc Natl Acad Sci U S A* 114, 3234-3239.

811 Tomita, S., Adesnik, H., Sekiguchi, M., Zhang, W., Wada, K., Howe, J. R., Nicoll, R. A., and  
812 Brecht, D. S. (2005). Stargazin modulates AMPA receptor gating and trafficking by distinct  
813 domains. *Nature* *435*, 1052-1058.

814 Twomey, E. C., Yelshanskaya, M. V., Grassucci, R. A., Frank, J., and Sobolevsky, A. I. (2017a).  
815 Channel opening and gating mechanism in AMPA-subtype glutamate receptors. *Nature*  
816 Twomey, E. C., Yelshanskaya, M. V., Grassucci, R. A., Frank, J., and Sobolevsky, A. I. (2017b).  
817 Structural Bases of Desensitization in AMPA Receptor-Auxiliary Subunit Complexes. *Neuron*  
818 *94*, 569-580.e5.

819 Xu, Y., Ramu, Y., Shin, H.-G., Yamakaze, J., and Lu, Z. (2013). Energetic role of the paddle  
820 motif in voltage gating of Shaker K(+) channels. *Nat Struct Mol Biol* *20*, 574-581.

821 Ye, S., Huber, T., Vogel, R., and Sakmar, T. P. (2009). FTIR analysis of GPCR activation using  
822 azido probes. *Nat Chem Biol* *5*, 397-399.

823 Ye, S., Köhrer, C., Huber, T., Kazmi, M., Sachdev, P., Yan, E. C. Y., Bhagat, A., RajBhandary, U.  
824 L., and Sakmar, T. P. (2008). Site-specific incorporation of keto amino acids into functional G  
825 protein-coupled receptors using unnatural amino acid mutagenesis. *J Biol Chem* *283*, 1525-  
826 1533.

827 Ye, S., Zaitseva, E., Caltabiano, G., Schertler, G. F. X., Sakmar, T. P., Deupi, X., and Vogel, R.  
828 (2010). Tracking G-protein-coupled receptor activation using genetically encoded infrared  
829 probes. *Nature* *464*, 1386-1389.

830 Yelshanskaya, M. V., Saotome, K., Singh, A. K., and Sobolevsky, A. I. (2016a). Probing  
831 Intersubunit Interfaces in AMPA-subtype Ionotropic Glutamate Receptors. *Sci Rep* *6*, 19082.

832 Yelshanskaya, M. V., Mesbahi-Vasey, S., Kurnikova, M. G., and Sobolevsky, A. I. (2017). Role  
833 of the Ion Channel Extracellular Collar in AMPA Receptor Gating. *Sci Rep* *7*, 1050.

834 Yelshanskaya, M. V., Singh, A. K., Sampson, J. M., Narangoda, C., Kurnikova, M., and  
835 Sobolevsky, A. I. (2016b). Structural Bases of Noncompetitive Inhibition of AMPA-Subtype  
836 Ionotropic Glutamate Receptors by Antiepileptic Drugs. *Neuron* *91*, 1305-1315.

837 Zachariassen, L. G., Katchan, L., Jensen, A. G., Pickering, D. S., Plested, A. J., and Kristensen,  
838 A. S. (2016). Structural rearrangement of the intracellular domains during AMPA receptor  
839 activation. *Proc Natl Acad Sci U S A* *113*, E3950-9.

840 Zhao, Y., Chen, S., Yoshioka, C., Bacongus, I., and Gouaux, E. (2016). Architecture of fully  
841 occupied GluA2 AMPA receptor-TARP complex elucidated by cryo-EM. *Nature*

842 Zhou, Y., Xia, X. M., and Lingle, C. J. (2011). Cysteine scanning and modification reveal major  
843 differences between BK channels and Kv channels in the inner pore region. *Proc Natl Acad Sci*  
844 *U S A* *108*, 12161-12166.

845



846 **Supplementary Material**

847

848 **Movie 1 Gating modules**

849 Residues corresponding to three spatially contiguous gating modules in the GluA2 pore domain are  
850 shown. The collar (green), the bundle crossing (magenta) and the selectivity filter (F579AzF, cyan) are  
851 flanked by the null mutants (wheat).

852

853 **Supplementary Table 1: Western blot analysis.**

854 **Supplementary Table 2: Kinetics of glutamate responses of selected constructs.**

855 **Supplementary Table 3: Summary of UV-induced changes in glutamate response.**

856 **Supplementary Table 4: Amplitudes of control and “readthrough” currents.**

857

858  
859

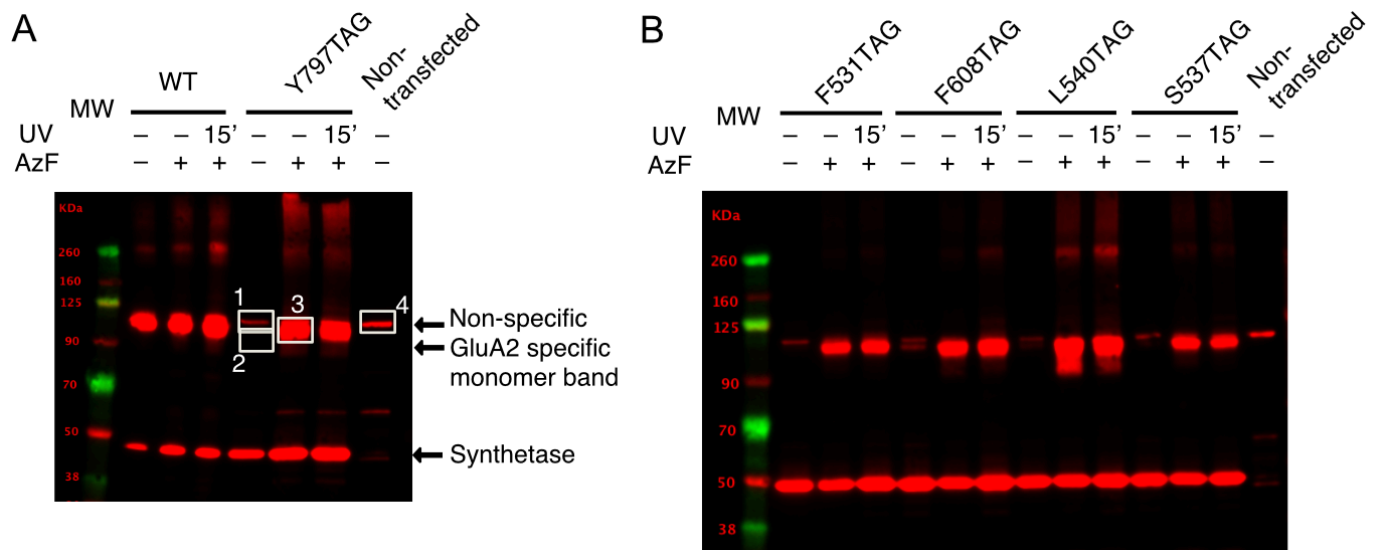

860  
861  
862  
863  
864  
865  
866  
867  
868  
869  
870  
871  
872  
873  
874

**Supplementary Figure 1. Representative Western blots of GluA2 TAG mutants rescued by AzF incorporation.**

A Estimation of the enrichment of expression by AzF for the Y797TAG mutant. Western blotting against the FLAG epitopes on GluA2 and the tRNA synthetase also reveals a non-specific band around 100 kDa, similar in size to monomeric GluA2 (indicated for non-transfected HEK 293-T cells with white box #4). Since we could not separate the non-specific band from actual rescue in presence of UAA, we calculated minimum enrichment following inclusion of AzF by taking the ratio of densitometric measurement including the non-specific band (Box #3 / [Box #1 + Box #2]) or the maximum enrichment by excluding the non-specific band (Box #3/ Box #2). B Typical Western blot for measurement of enrichment following AzF inclusion in culture media for four TAG mutants of GluA2. Dimeric fractions can be seen around 260 kDa for L540, but these were not enhanced by UV (15' exposure).

875

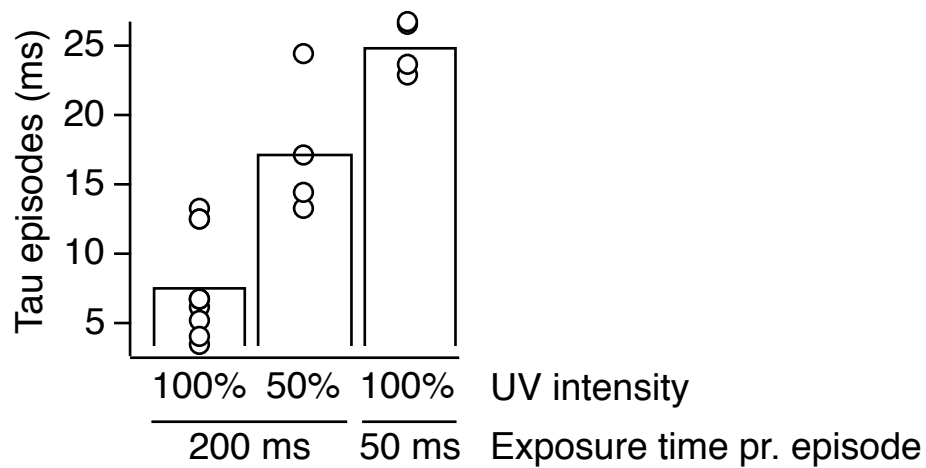

876

877

878

879 **Supplementary Figure 2. Dependency on UV intensity and exposure time.**

880 Summary of the exponential half-times of GluA2-F608AzF inactivation, plotted against the UV  
881 exposure periods per episode in milliseconds. The rate of peak current reduction could be manipulated  
882 by changing the intensity of the UV light from 100% ( $\tau$  200ms,100% = 7 ms) to 50% ( $\tau$  200ms,50% =  
883 17 ms) or reducing the time interval of UV exposure to 50 ms ( $\tau$  50ms,100% = 25 ms), verifying that  
884 the peak-current reduction is controlled by UV light.

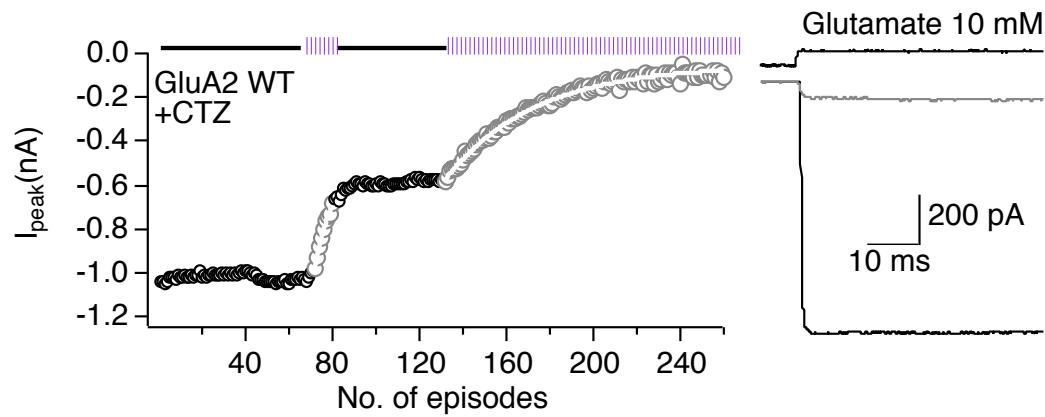

885

886

887 **Supplementary Figure 3. UV-induced inhibition of GluA2 wild-type in the presence of CTZ.**

888 UV exposures resulted in a decrease in the peak current after the application of glutamate and 100  $\mu\text{M}$

889 CTZ. This effect was irregular and showed batch to batch variation (compare with Klippenstein et al.

890 2014). *Left*; Example kymogram illustrates the UV inactivation of GluA2 WT due to the presence of

891 CTZ, plotted as described in the legend to **Figure 3**. *Right*; Example responses from the beginning

892 (black) and end of the kymogram (grey).

893

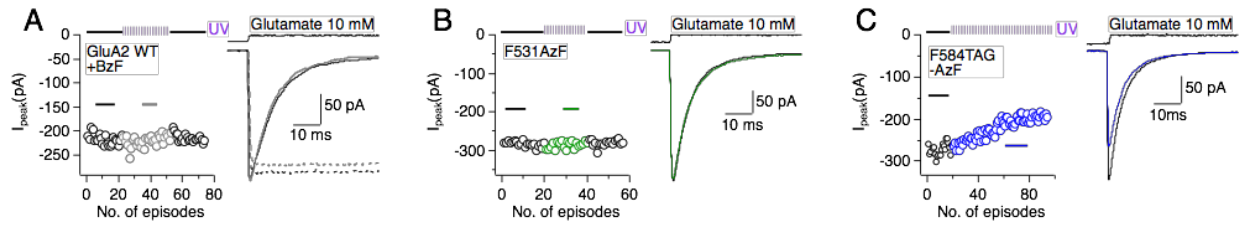

894

895 **Supplementary Figure 4. Three null results of UV exposure.**

896 A UV exposure did not change the glutamate response for the GluA2 WT cultured in the presence of  
897 BzF and the appropriate tRNA-synthetase pair. Kymogram (*left*) as described in Figure 3A-E illustrates  
898 the time course of UV exposure, and example currents (*right*) from sections of the histogram labeled  
899 with a solid line. The effect of UV exposure in the active state of the GluA2 WT was also tested by  
900 introducing the L483Y mutation to block desensitization (dotted lines). **B** GluA2-F531AzF was  
901 insensitive to UV. **C** All tested TAG mutants that were not rescued with an UAA, but that gave a current  
902 due to read through, were also insensitive to UV, as exemplified by F584TAG. This patch exhibited a  
903 constant mild rundown, independent of the UV exposure.

904  
905

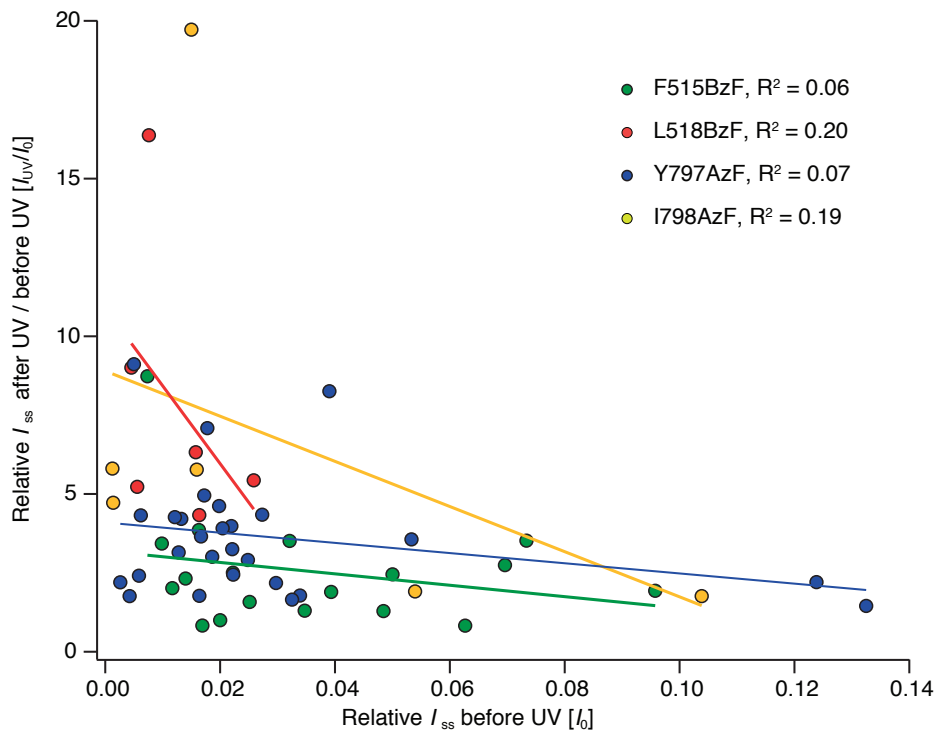

906  
907

**Supplementary Figure 5. Relation between the initial steady-state current and photopotential.**

908 Graph showing the absence of correlation between relative steady-state currents ( $I_{ss}/I_{peak}$ ) before UV  
909 application ( $I_0$ ) and the fold change in relative steady-state current ( $I_{ss}/I_{peak}$ ) before and after UV  
910 application ( $I_{UV}/I_0$ ) for the GluA2-F515BzF, -L518BzF, -Y797AzF and -I798AzF mutants. Thus, UV  
911 induced photopotential of the relative steady-state current was independent of the amplitude of the  
912 initial relative steady-state current.  
913  
914

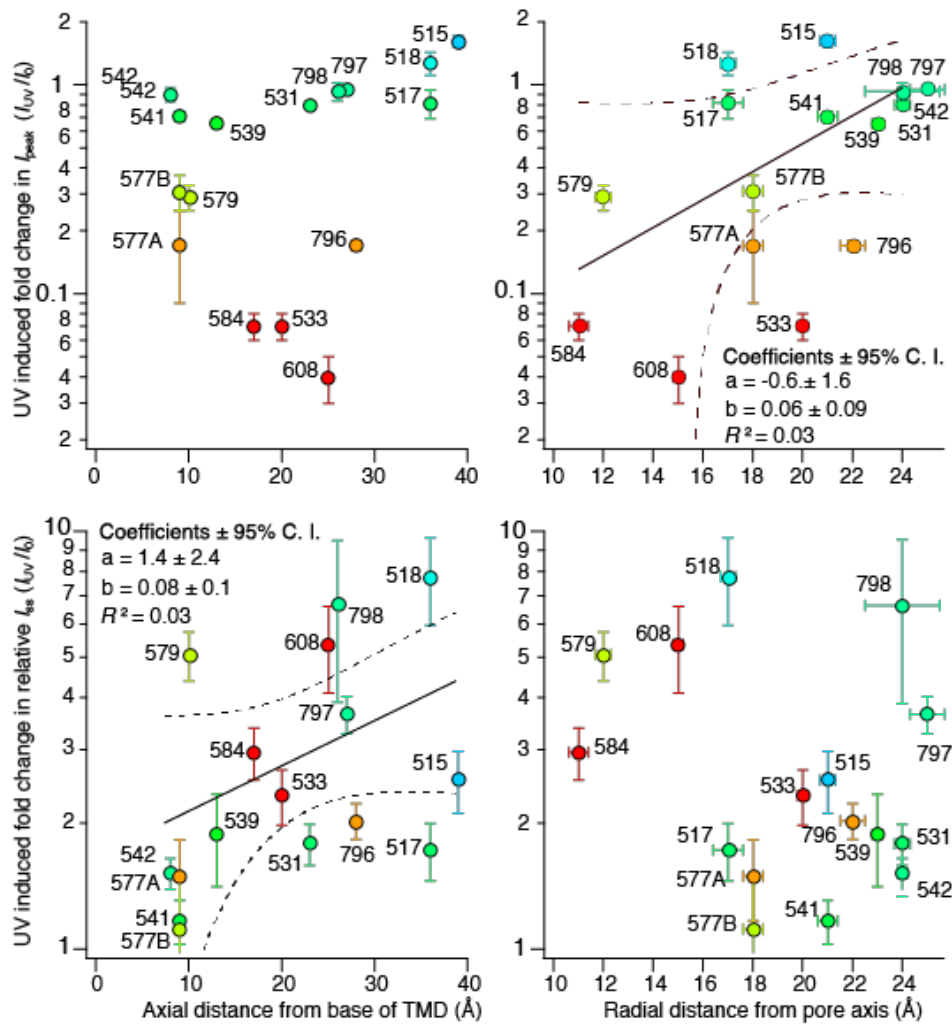

915

916 **Supplementary Figure 6. Comparing distances at photoactive sites and UV induced effects.**

917 The UV induced fold changes of peak currents (*upper panels*) and relative steady-state currents  
 918 ( $I_{ss}/I_{peak}$ ) (*lower panels*), of each mutant were plotted against the axial distance of UAA insertion site  
 919 from the base of the TMD (*left panels*) or the radial distance from the pore axis (*right panels*) in  
 920 Ångström. Distances were taken between the C<sub>α</sub> atoms of the UAA insertion site and the base of the  
 921 TMD (L817) or between C<sub>α</sub> atoms of the UAA insertion site in diametrically opposed chains. The sites  
 922 are color-coded according to their UV-induced fold change in peak current (as in Figure 6B). 577A and  
 923 577B denotes the insertion of AzF and BzF, respectively, at this particular site.

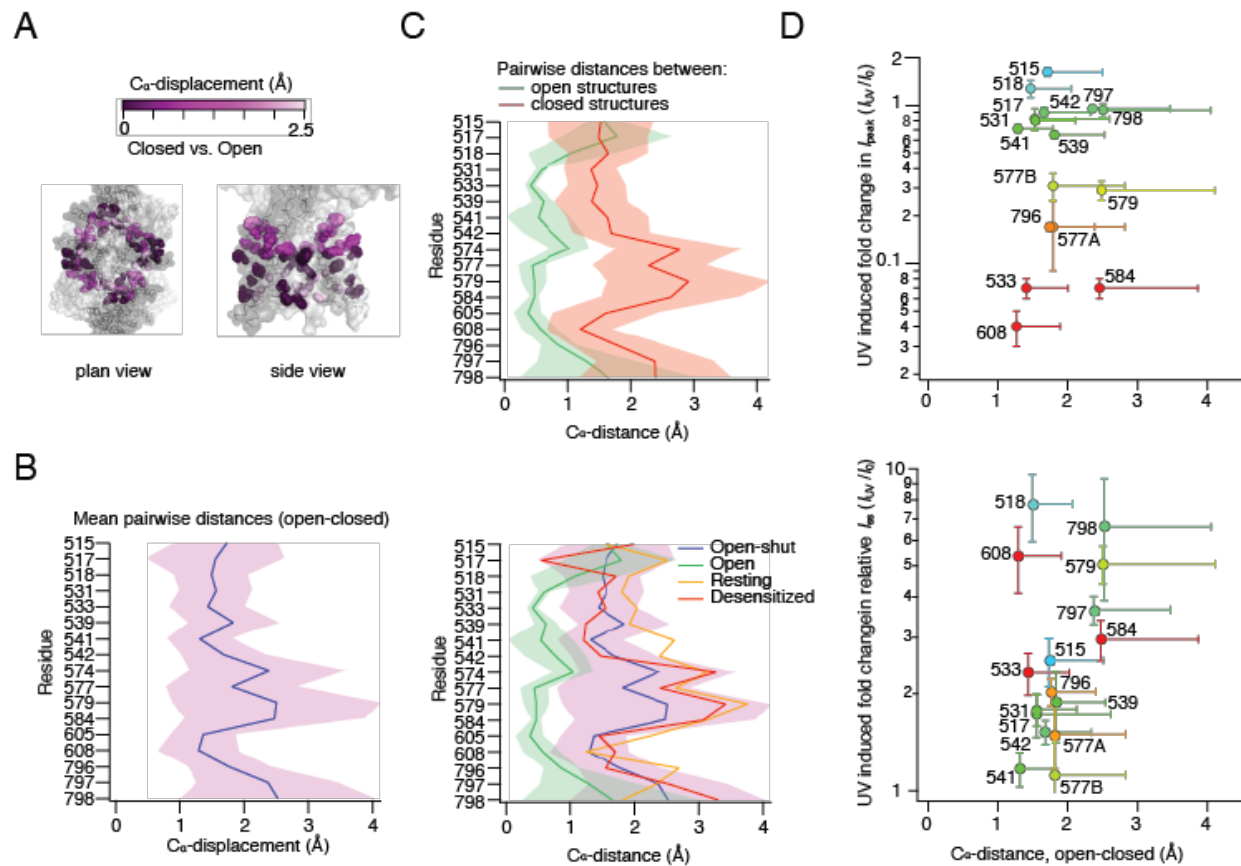

924  
925  
926  
927  
928  
929  
930  
931  
932  
933  
934  
935  
936  
937  
938  
939

**Supplementary Figure 7. Amino acid displacements in published structures.**

**A** Colored bar (*upper*) shows the used color code for  $C_{\alpha}$ -displacement in Ångström of the AzF/BzF insertion sites between resting (PDB ID: 3kg2) and active (PDB ID: 5weo) state. Dark magenta indicates no to very small movements, whereas light magenta indicates bigger movements. Pymol figures (*bottom*) show selected insertion sites as spheres colored according to its UV  $C_{\alpha}$ -displacement effect. **B** Relation between the  $C_{\alpha}$ -distances at the UAA insertion sites in the open to closed state structures. **C** Structures were further divided into closed and open (*upper panel*) and open-shut, open, resting and desensitized state (*lower panel*). **D** Graph showing the  $C_{\alpha}$ -distance between open and closed structures and the site-specific UV-induced effect on receptor peak current amplitude (*upper*) and relative steady-state current (*bottom*) for each site of the TMD, respectively. The individual sites are color-coded according to the specific UV-induced effects on peak current as in supplementary figure 6. Distances between  $C_{\alpha}$  atoms in the same chains were measured between open and closed channel structures. Errors derive from variability in distances between different subunits and between different structures.



GluA2 I798AzF

Before UV exposure

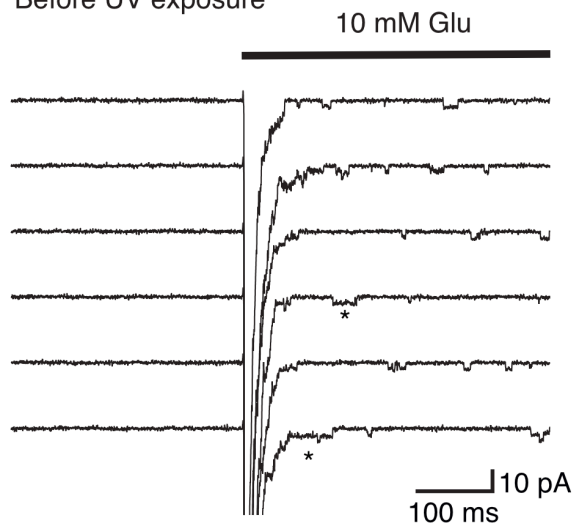

After UV exposure

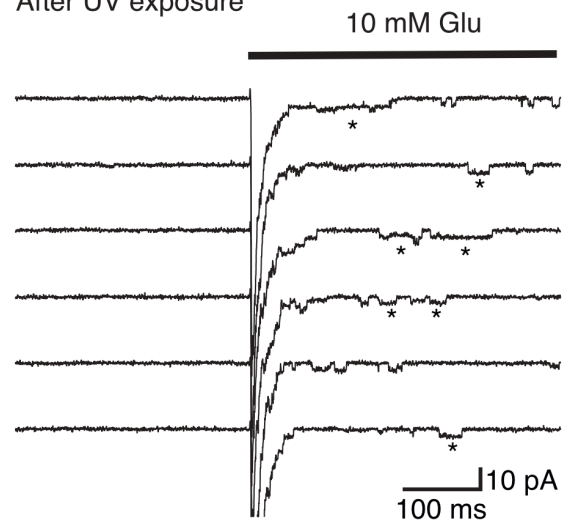

940

941

942

943 **Supplementary Figure 8. Photoactivation at I798AzF lengthens the activations of individual**

944 **receptors.**

945 Representative desensitized traces from GluA2-I798AzF outside-out patches before (*left*) and after

946 (*right*) UV exposure. After UV exposure, long bursts (>25 ms) with high open probability (\*) became

947 much more prevalent. The traces were filtered at 1kHz. The holding voltage was -60 mV.
